# Supplementary material for: Dissolved organic matter characterization in soils and streams in a small coastal low-Arctic catchment
Source: Copernicus journal article supplement (doi:10.5194/bg-19-3073-2022), 2022-07-01
Supplement: Supplementary file 1 [file bg-19-3073-2022-supplement.pdf]

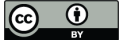

*Supplement of*

## **Dissolved organic matter characterization in soils and streams in a small coastal low-Arctic catchment**

**Niek Jesse Speetjens et al.**

*Correspondence to:* Niek Jesse Speetjens ([n.j.speetjens@vu.nl](mailto:n.j.speetjens@vu.nl), [niek.j.speetjens@gmail.com](mailto:niek.j.speetjens@gmail.com)) and Jorien E. Vonk ([j.e.vonk@vu.nl](mailto:j.e.vonk@vu.nl))

The copyright of individual parts of the supplement might differ from the article licence.

## Supplementary Figures

|                                                                                             |    |
|---------------------------------------------------------------------------------------------|----|
| FIGURE S1. TEMPERATURES ON HERSCHEL ISLAND AND FIELD SITE                                   | 2  |
| FIGURE S2. VALUES OF STABLE WATER ISOTOPES WITH RESPECT TO THE LMWL                         | 3  |
| FIGURE S3. MEAN SOIL SOC CONTENT (%) AND $\Delta^{13}\text{C-SOC}$ (‰)                      | 4  |
| FIGURE S4. DOC YIELD FOR POLYGON TYPES AND THERMAL LAYERS                                   | 5  |
| FIGURE S5. TRIBUTARIES INCUBATION                                                           | 6  |
| FIGURE S6. POREWATER INCUBATION                                                             | 7  |
| FIGURE S7. SHIFTS IN OPTICAL PROPERTIES RESPECTIVE TO THE PERMAFROST TABLE                  | 8  |
| FIGURE S8. $\delta^{13}\text{C-DOC}$ VALUES PER IDENTIFIED SOURCE                           | 9  |
| FIGURE S9. FLUCTUATIONS OF OPTICAL AND ISOTOPIC PROPERTIES AT THE OUTLET                    | 10 |
| FIGURE S10. MARKOV CHAIN MONTE CARLO BURN IN PERIODS.                                       | 11 |
| FIGURE S11. PROBABILITY DISTRIBUTIONS OF SOURCE CONTRIBUTION                                | 12 |
| FIGURE S12. PAIR-PLOT OF SPECTRAL INDICES IN SOIL                                           | 13 |
| FIGURE S13. PAIR-PLOT OF SPECTRAL INDICES BY LANDSCAPE CLASS                                | 14 |
| FIGURE S14. PAIR-PLOT OF SPECTRAL INDICES STREAMS                                           | 15 |
| FIGURE S15. HIX VS SUVA <sub>254</sub> FOR PORE WATER SAMPLES                               | 16 |
| FIGURE S16. VALUES OF $\delta^{13}\text{C-DOC}$ AT T=0 FOR THE INCUBATED PORE WATER SAMPLES | 17 |
| FIGURE S17. LOCATION OF SAMPLE SOURCES IN ISOTOPIC SPACE                                    | 18 |

## Supplementary Figures

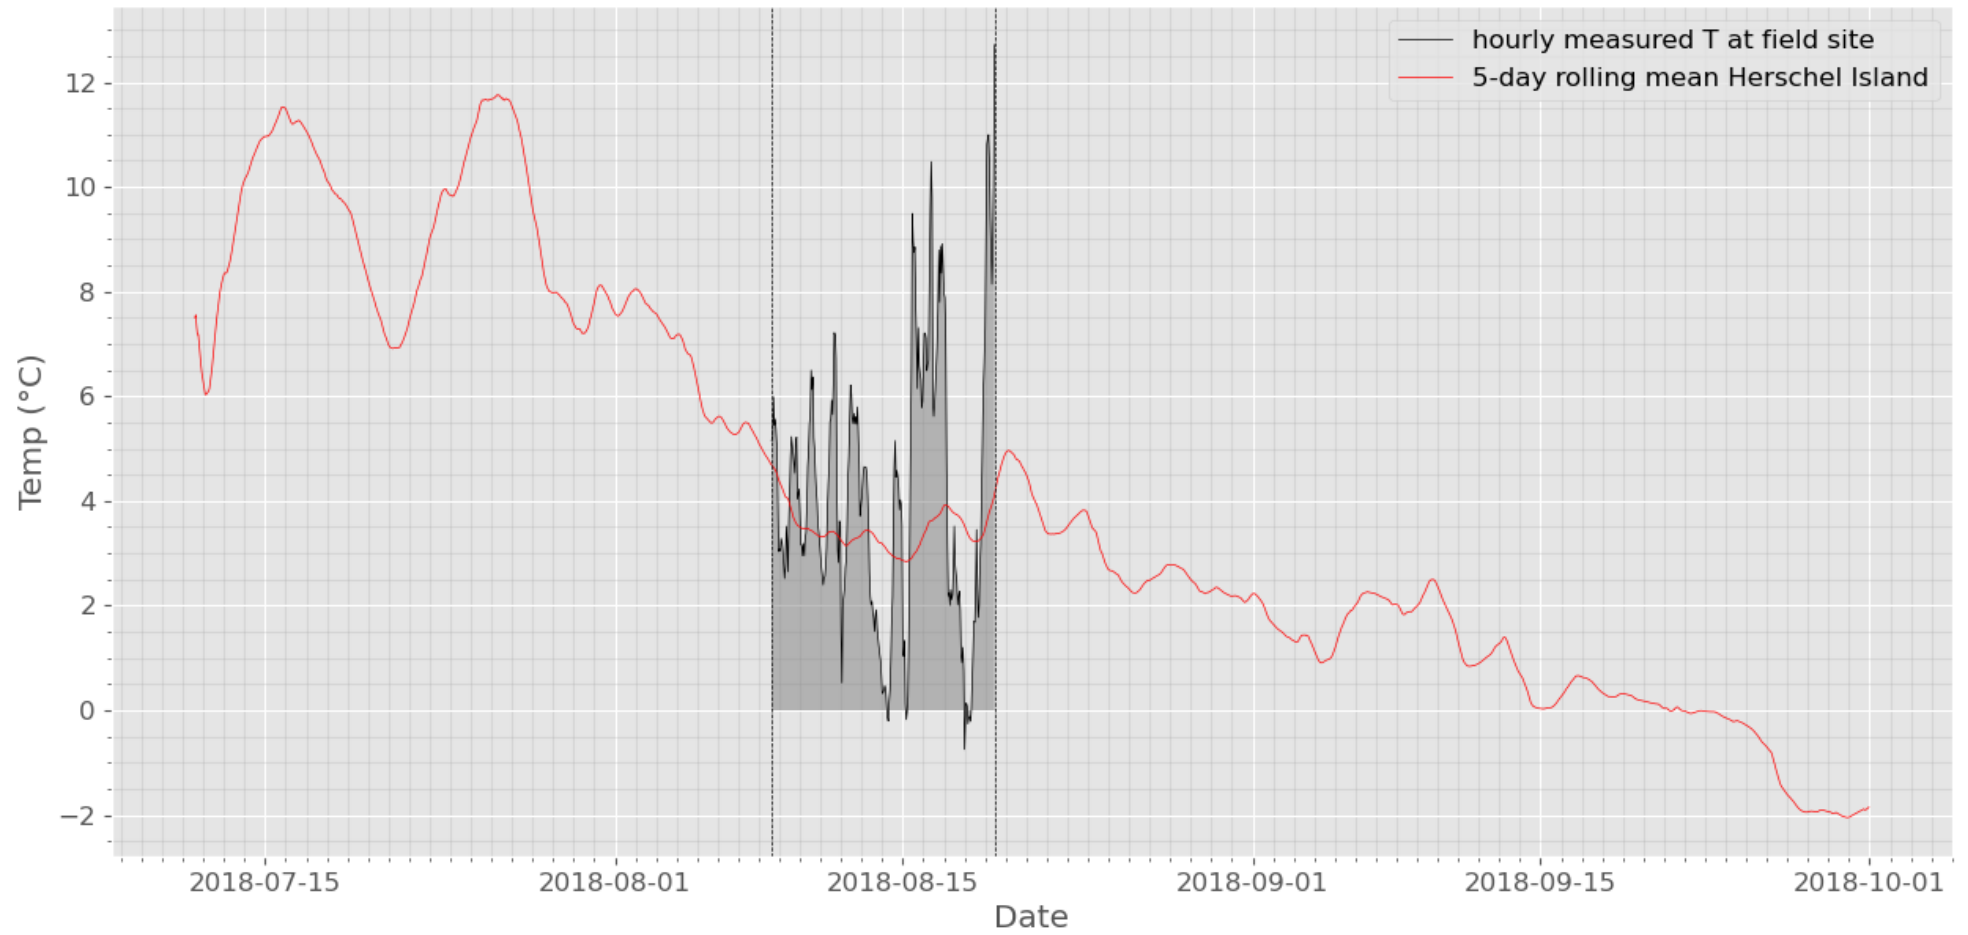

Figure S1. 5-day rolling mean temperature as measured on Herschel Island (July until October) in red and field site measured temperature (hourly) during the monitoring period.

## Supplementary Figures

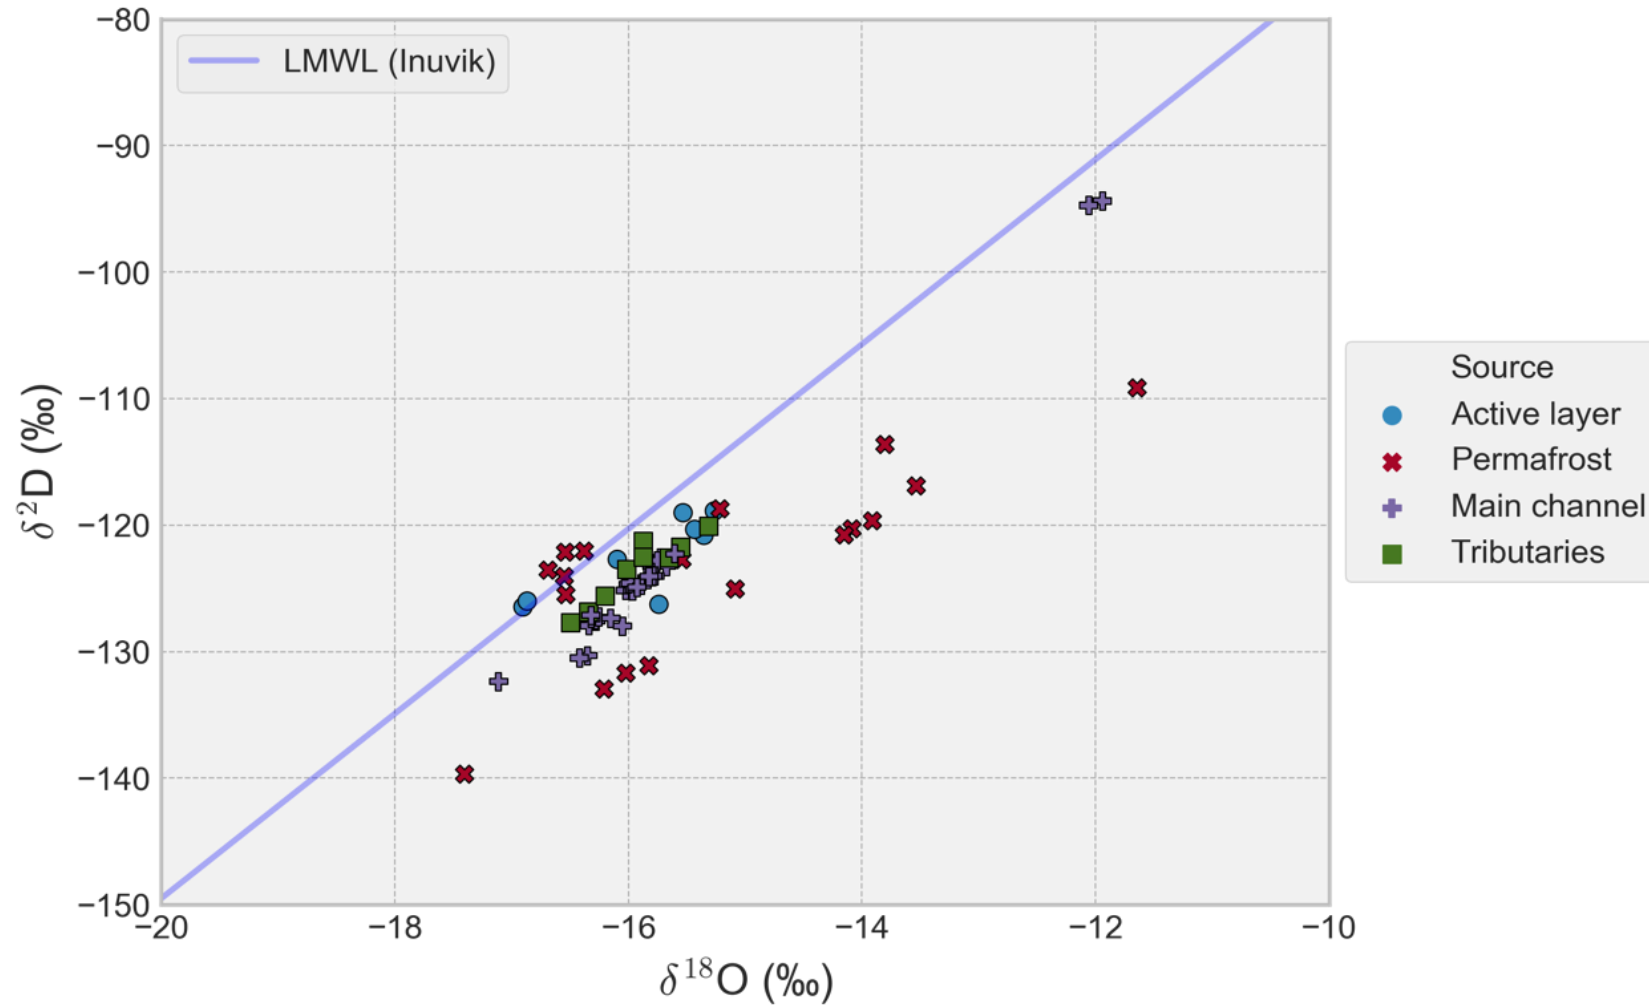

Figure S2. Summary of values of stable water isotopes with respect to the LMWL (Inuvik, Fritz et al., 2016).

## Supplementary Tables

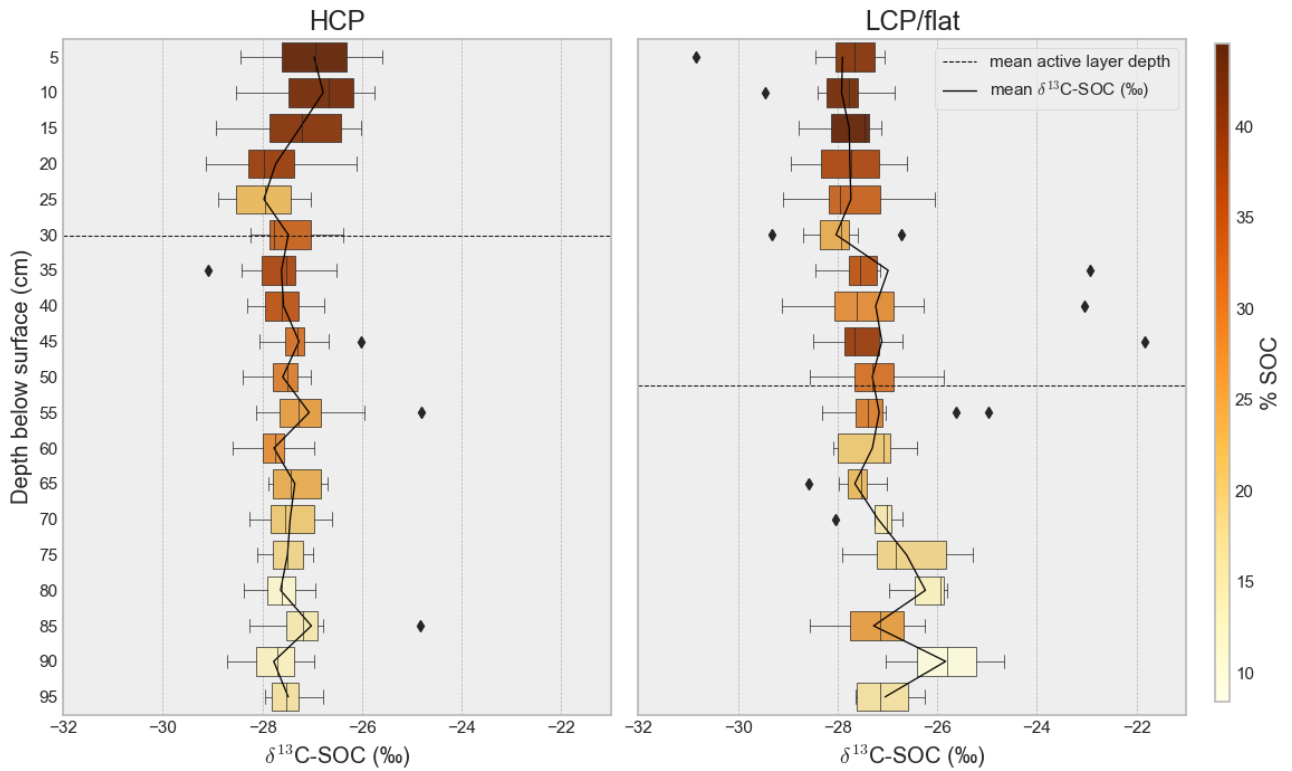

Figure S3. Mean soil SOC content (%) and  $\delta^{13}\text{C-SOC}$  (‰) results aggregated to 5 cm increments. Clearly visible is the difference in active layer depth between HCP (~30 cm) and LCP/flat (~52 cm) types. The HCP  $\delta^{13}\text{C-SOC}$  values show a more heterogeneous pattern over the depth of the active layer which might be attributable to increased drainage compared to LCP, which promotes preferential leaching, sorption and transport within the soil profile.

## Supplementary Tables

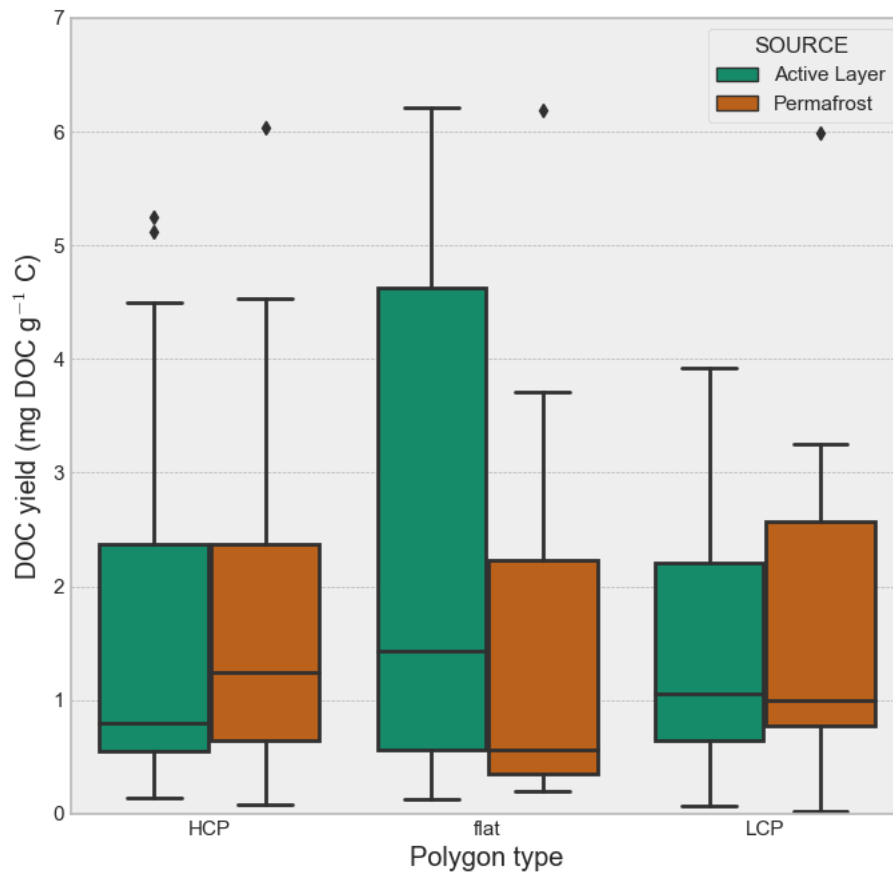

Figure S4. DOC yield per gram soil organic carbon for the three different polygon types and both thermal layers. We find that HCP active layer has a slightly lower mean than LCP active layer. Although not significant ( $p > 0.05$ ) we consider it plausible that this difference is caused by the difference in waterlogging conditions between HCP and LCP soils.

## Supplementary Tables

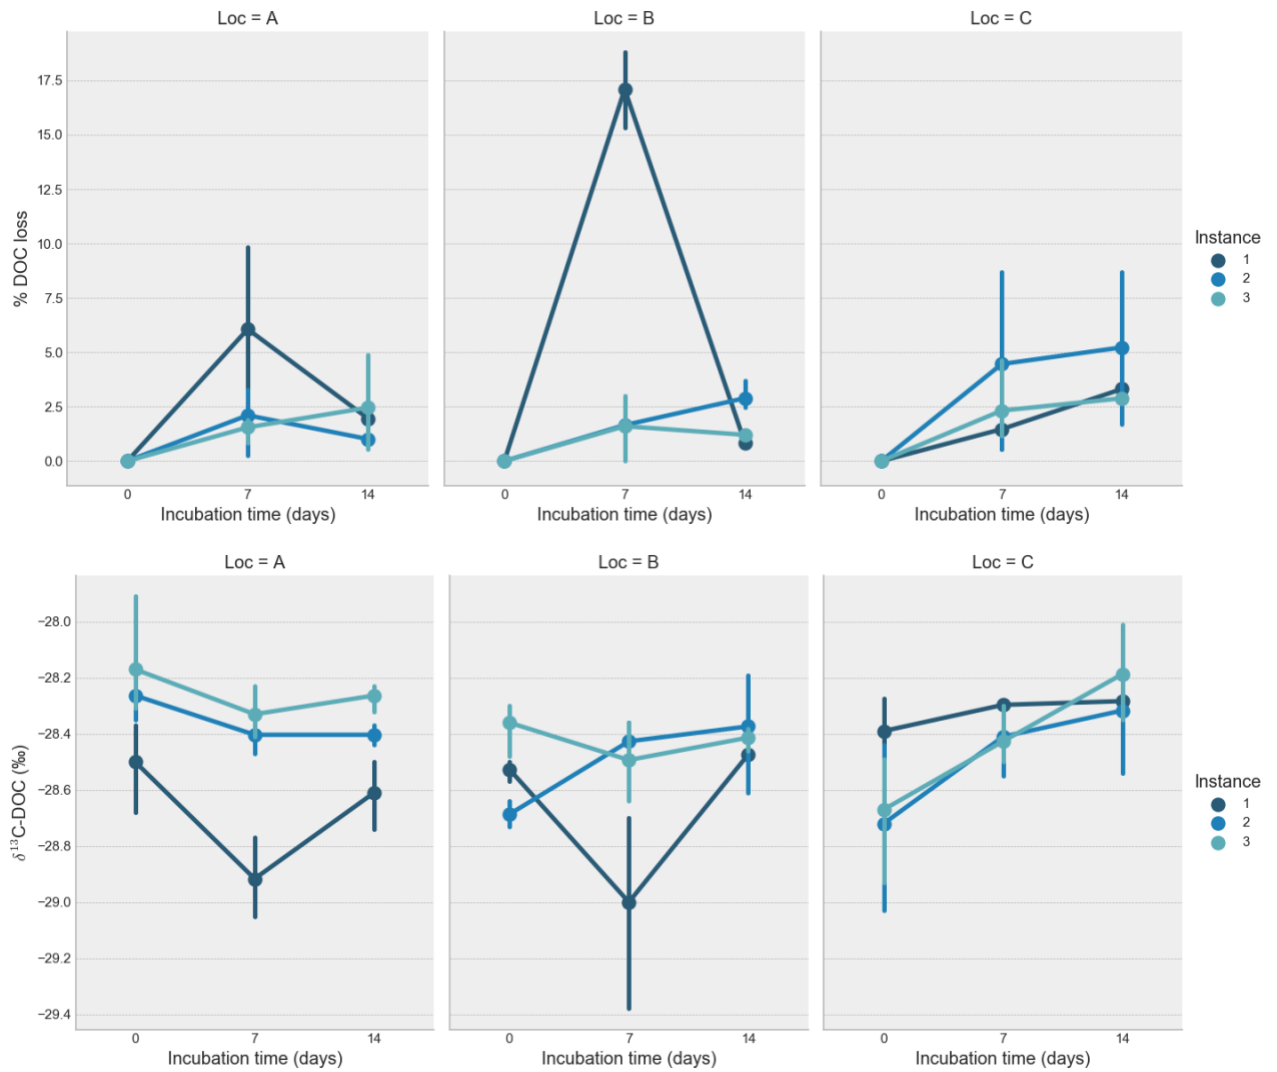

Figure S5. Tributaries incubation % DOC loss (with respect to t=0) plots for three locations (A, B, C) and three separate incubations (1: medium, 2: colder, 3: warmer sampling days) (top) and tributaries incubation  $\delta^{13}\text{C-DOC}$  for 3 locations (A, B, C) and 3 instances (1: medium, 2: colder, 3: warmer sampling days) (bottom)

## Supplementary Tables

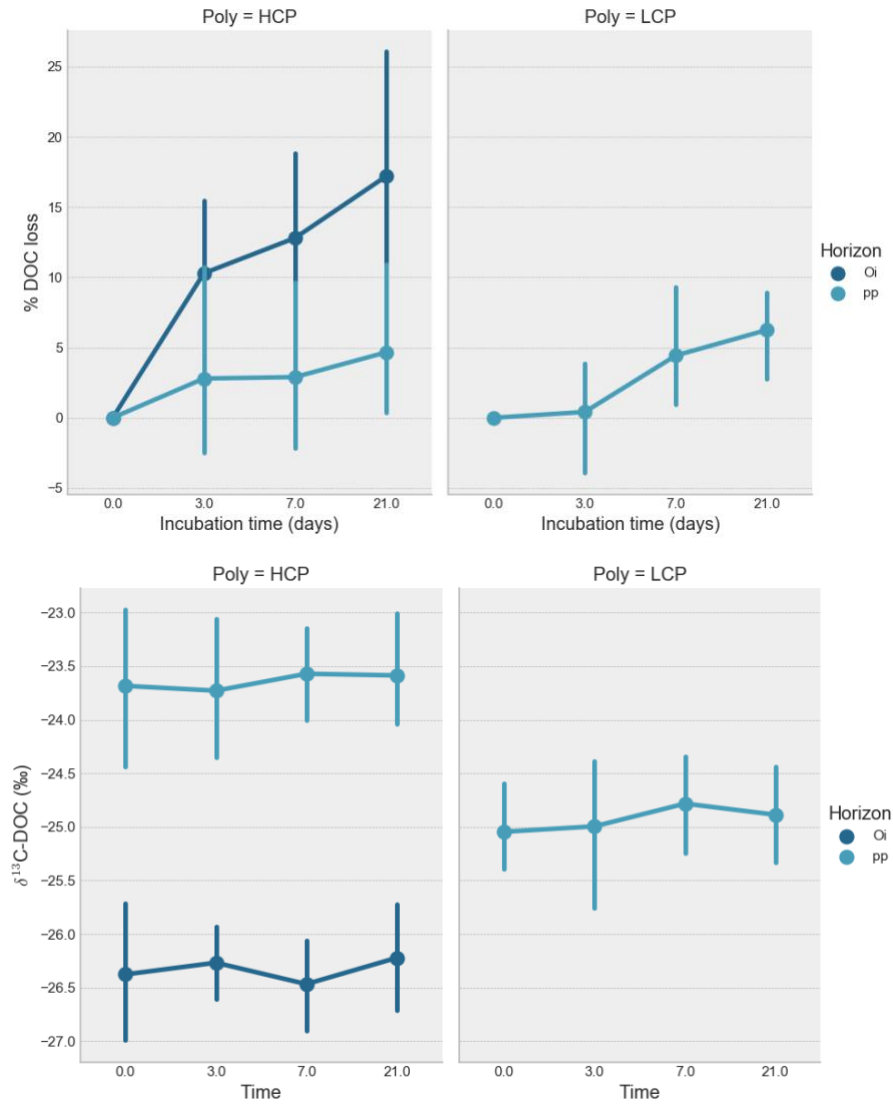

Figure S6. Porewater incubation % DOC loss (with respect to t=0) plots for 2 polygon types (HCP and LCP) (top) and porewater incubation  $\delta^{13}\text{C-DOC}$  (with respect to t=0) plots for 2 polygon types (HCP and LCP) (bottom)



## Supplementary Tables

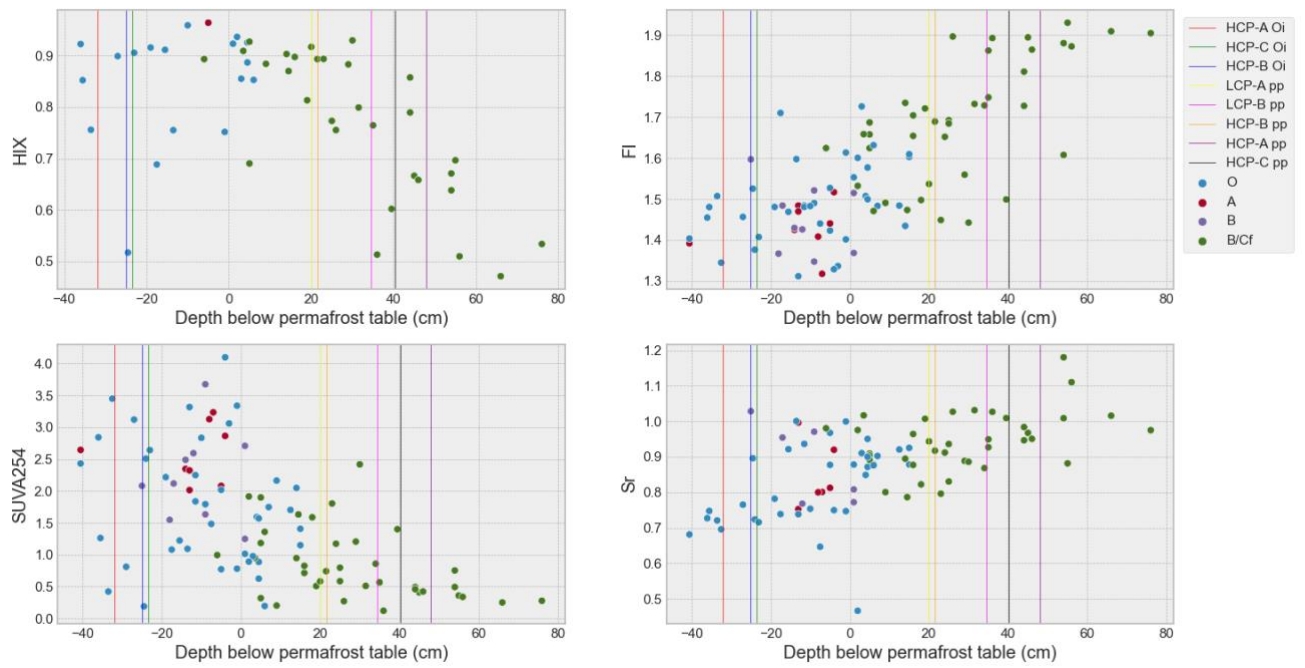

Figure S7. Shifts of HIX, FI, SUVA254 and Sr measured in porewater samples with depth respective to the permafrost table. Vertical lines show depths of incubated soil samples.

## Supplementary Tables

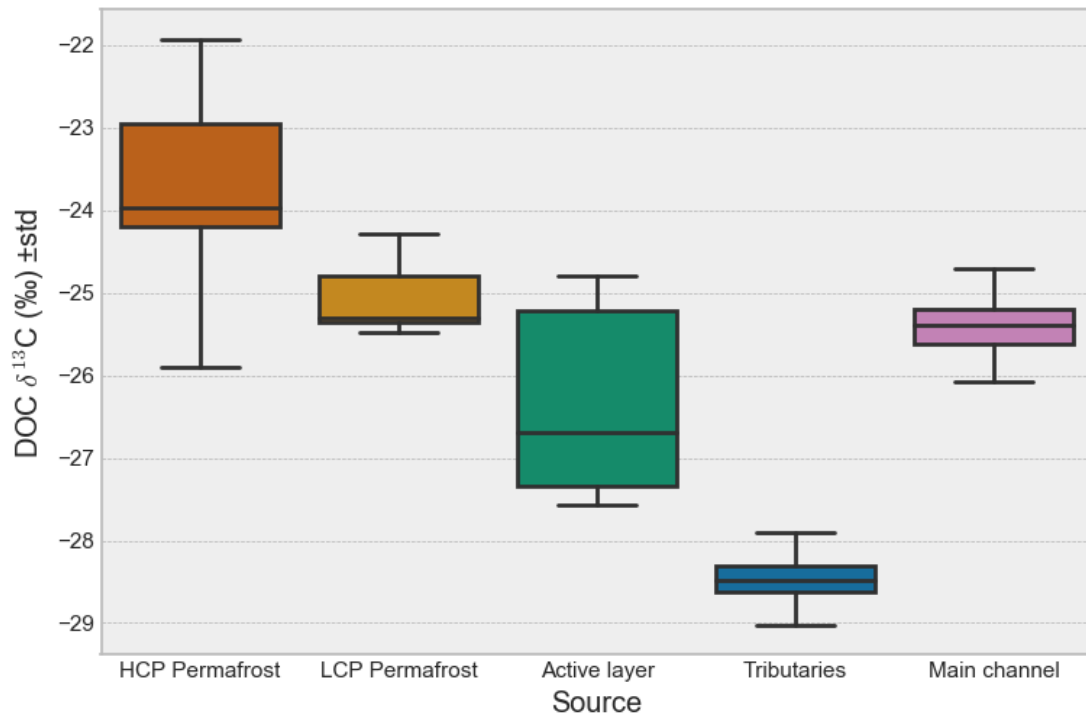

Figure S8.  $\delta^{13}\text{C}$ -DOC values per identified source.

Supplementary Tables

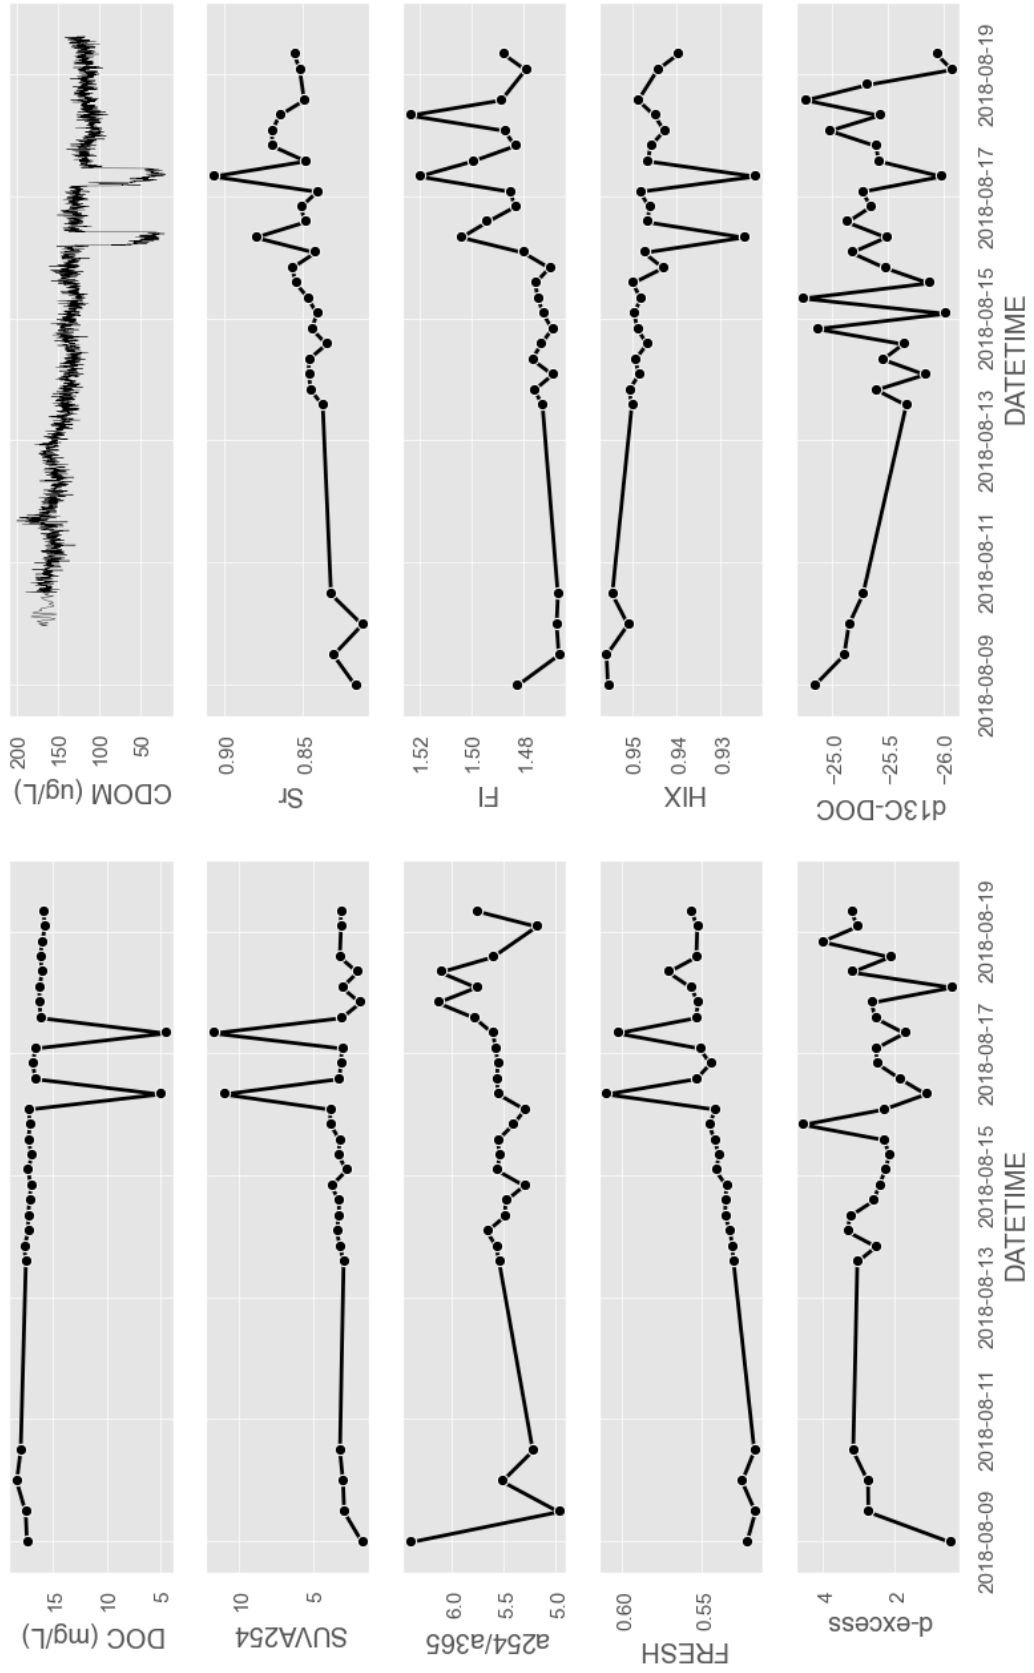

Figure S9. Fluctuations of optical and isotopic properties of stream water at the outlet.

## Supplementary Tables

Figures S10 and onward are not referenced in the text, yet they serve as extra information regarding this study.

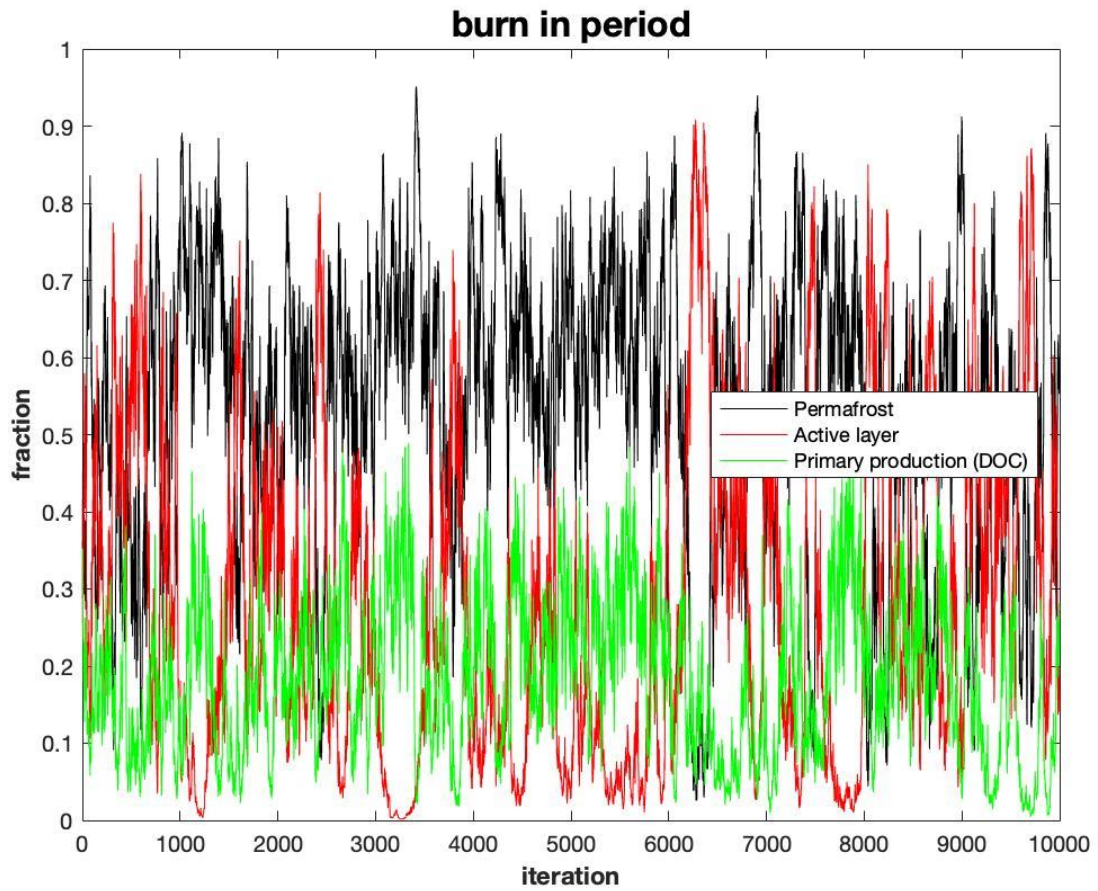

Figure S10. Fluctuations of model outcome over the Markov Chain Monte Carlo burn in periods.

## Supplementary Tables

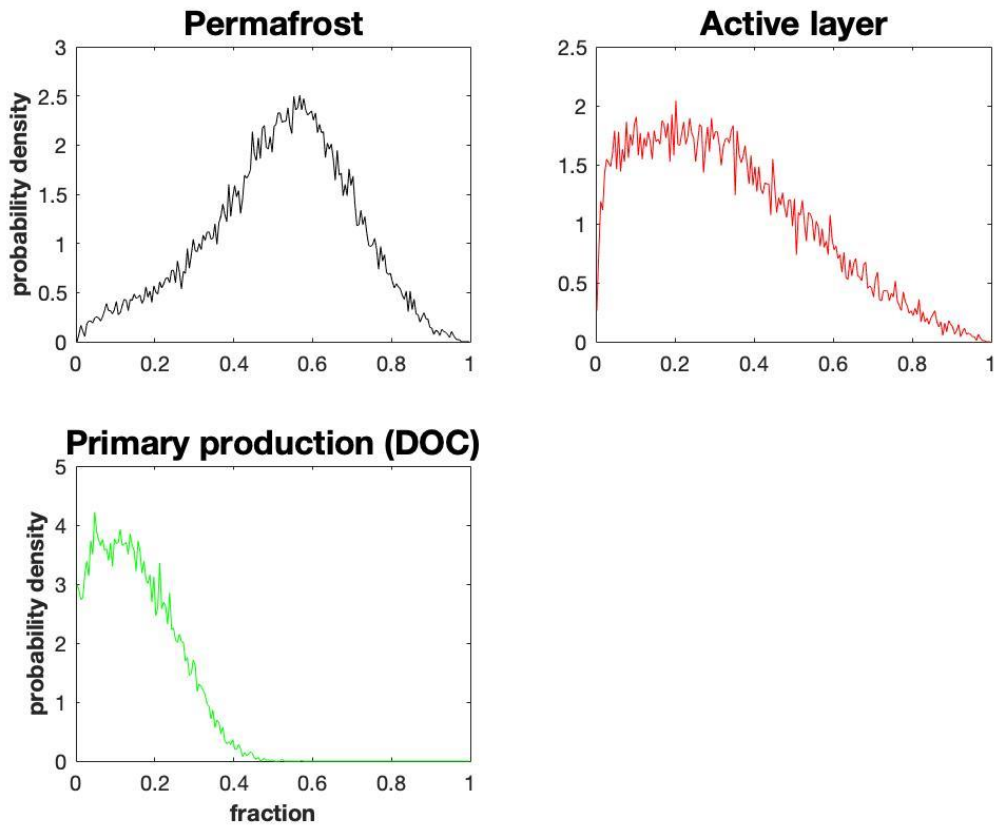

Figure S11. Probability distributions of source contribution at the catchment outlet using the endmember mixing model described in section 2.4.

# Supplementary Tables

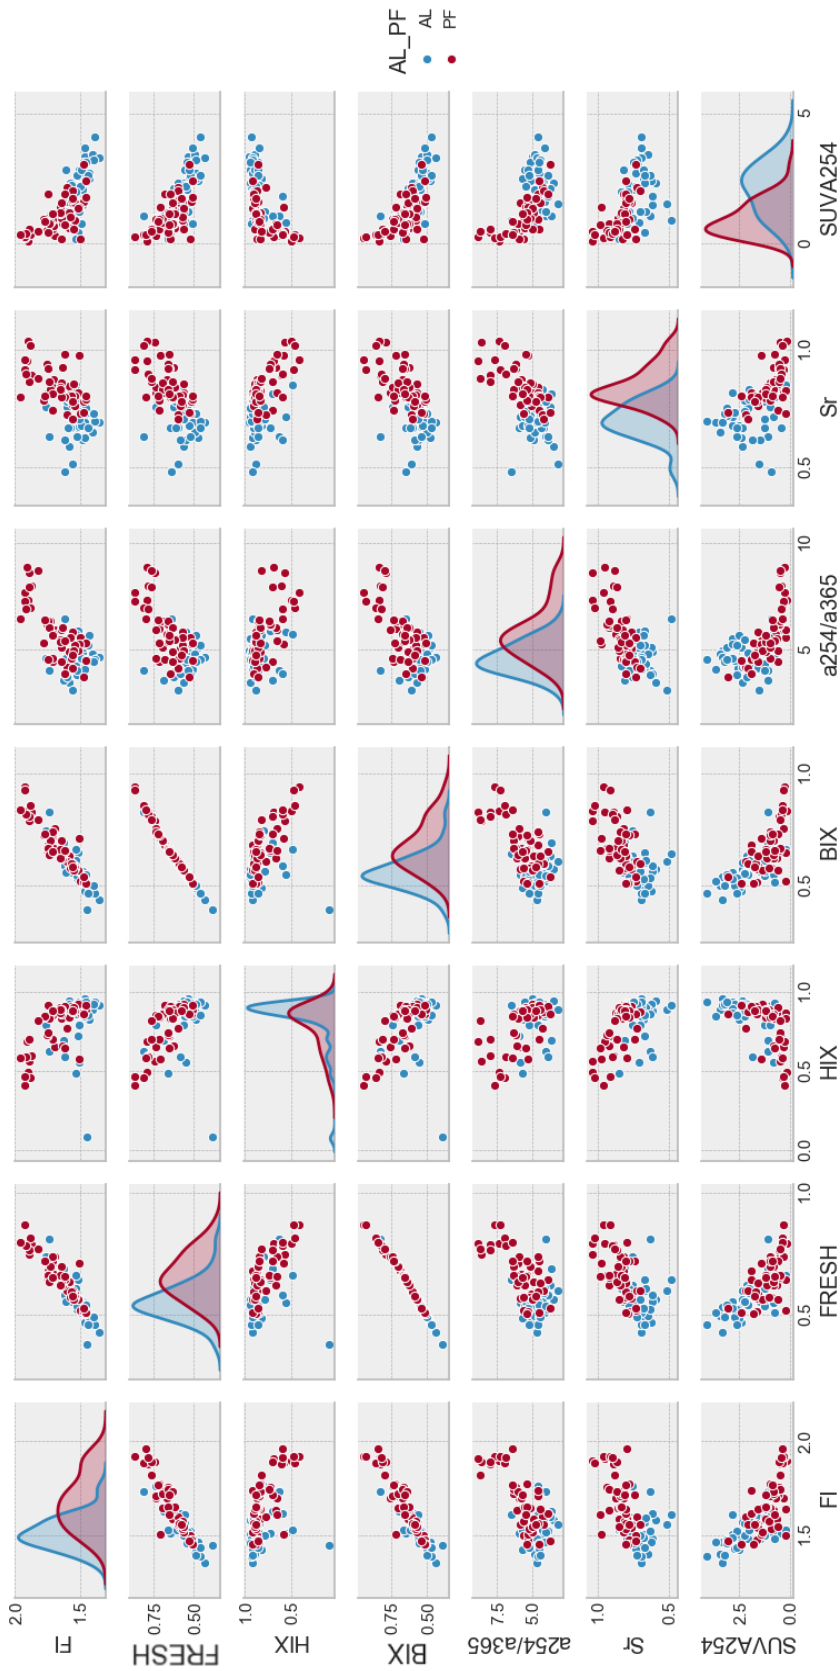

Figure S12. Pair-plot of spectral indices for the active layer (blue) and permafrost (red). Distributions and peak positions on the diagonal axis indicate differences between active layer and permafrost for each variable.

# Supplementary Tables

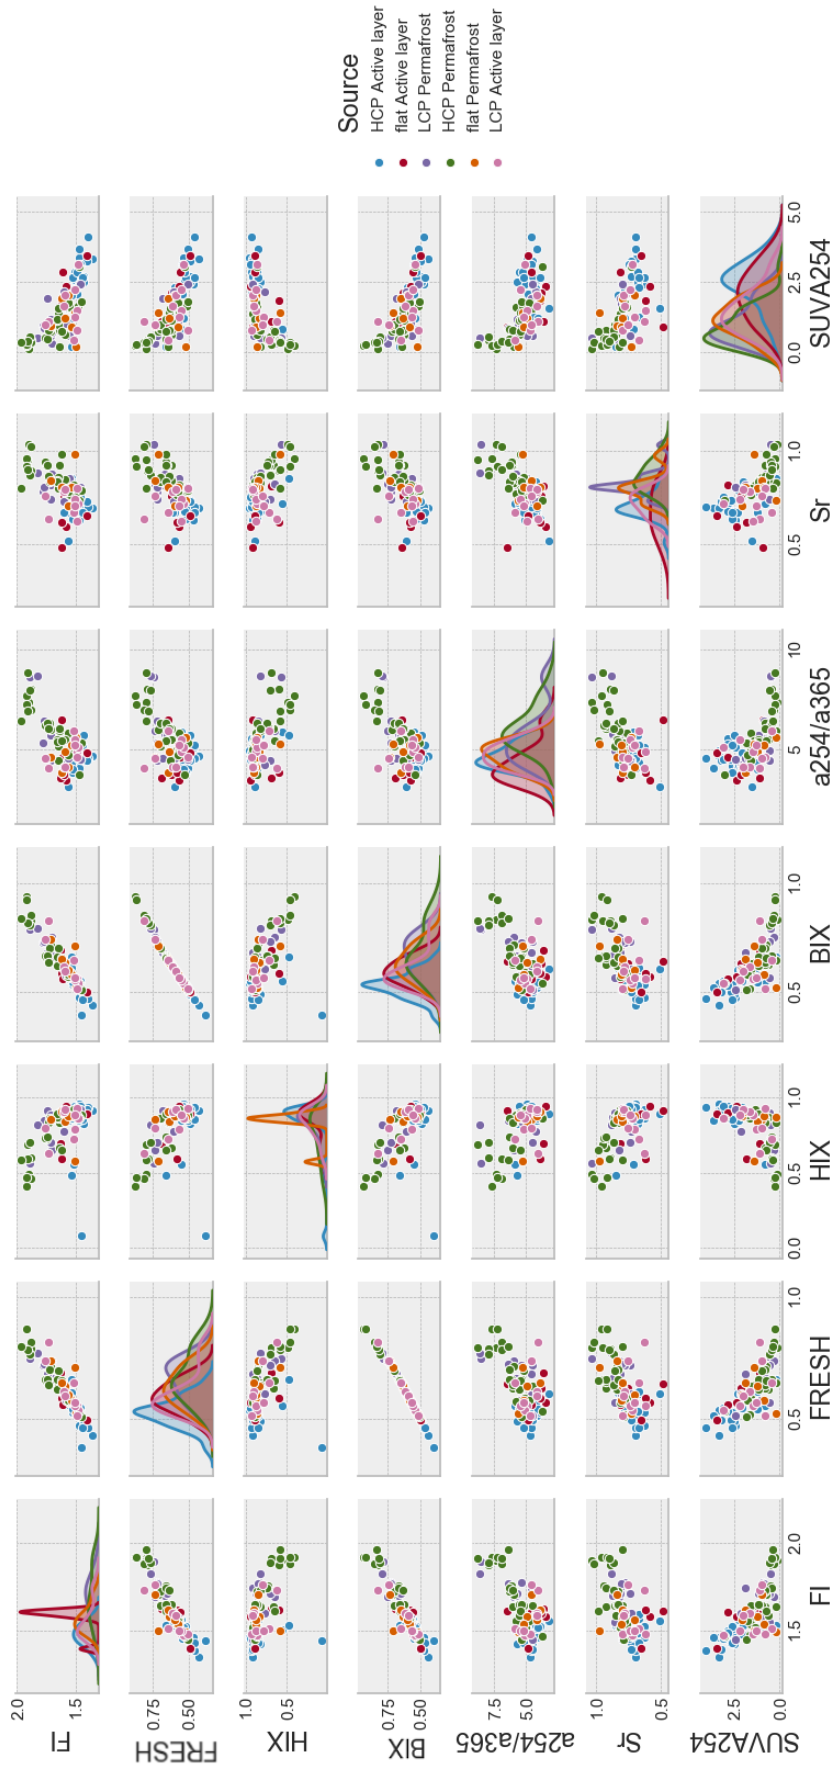

Figure S13. Pair-plot of spectral indices by classified source. Distributions and peak positions on the diagonal axis indicate differences between sources for each variable.

# Supplementary Tables

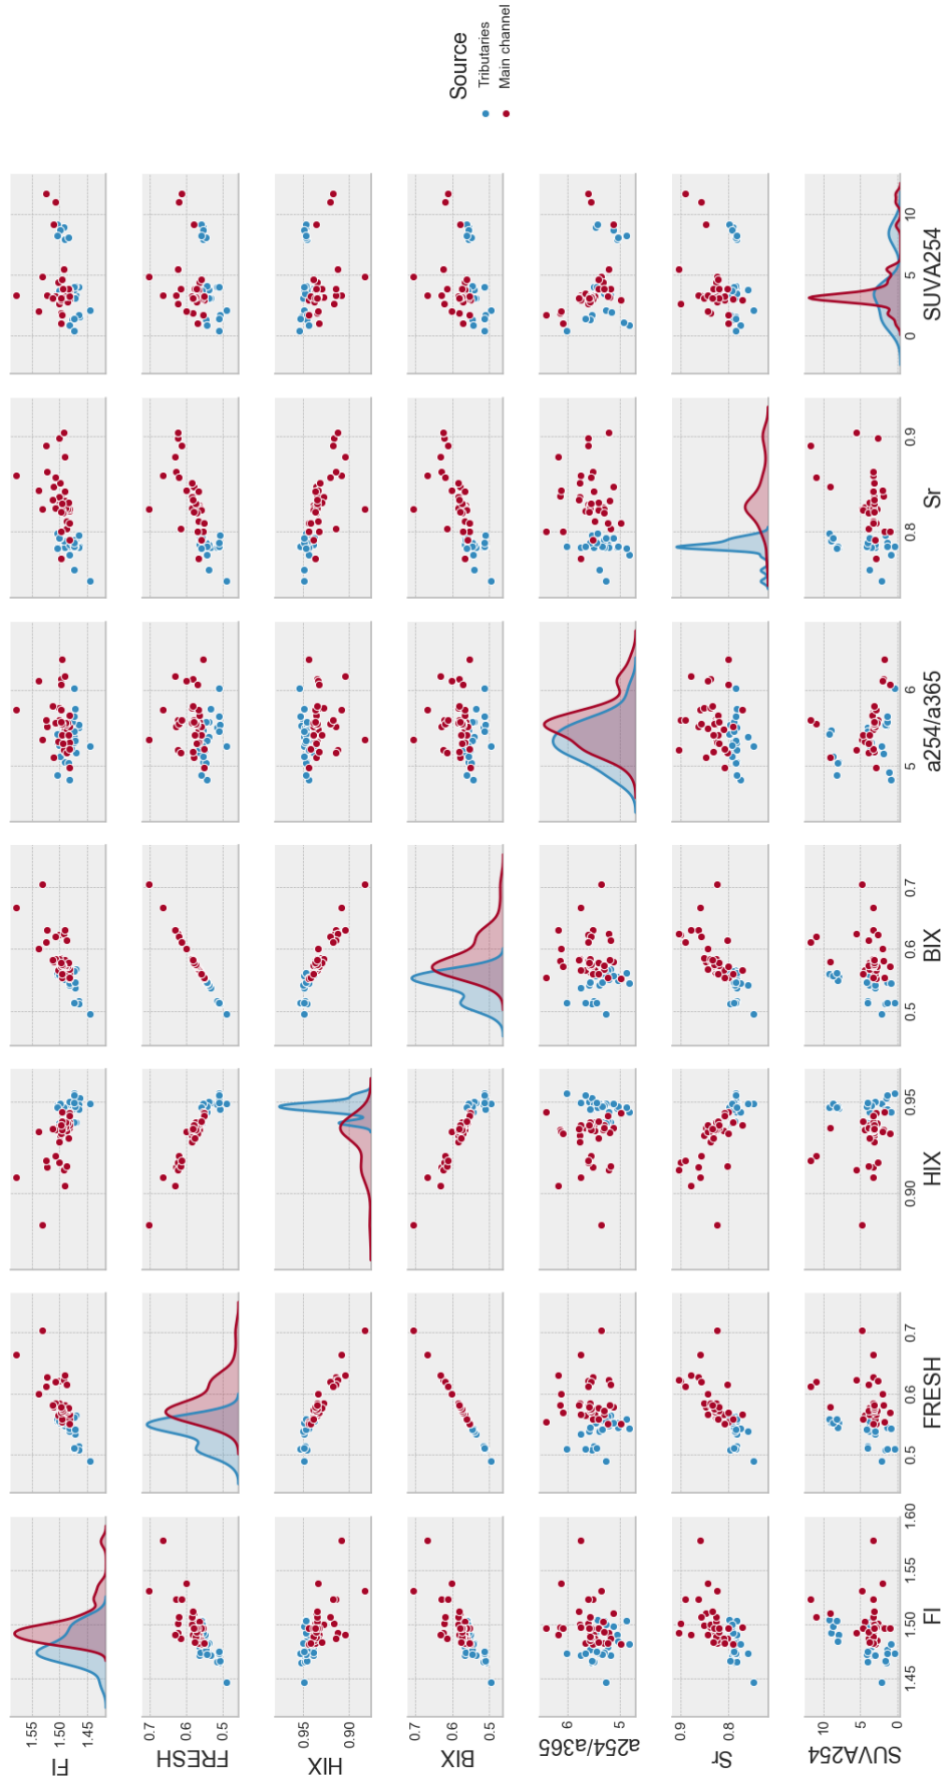

Figure S14. Pair-plot of spectral indices for tributaries (blue), and main channel (red). Distributions and peak positions on the diagonal axis indicate differences between sources for each variable.



Supplementary Tables

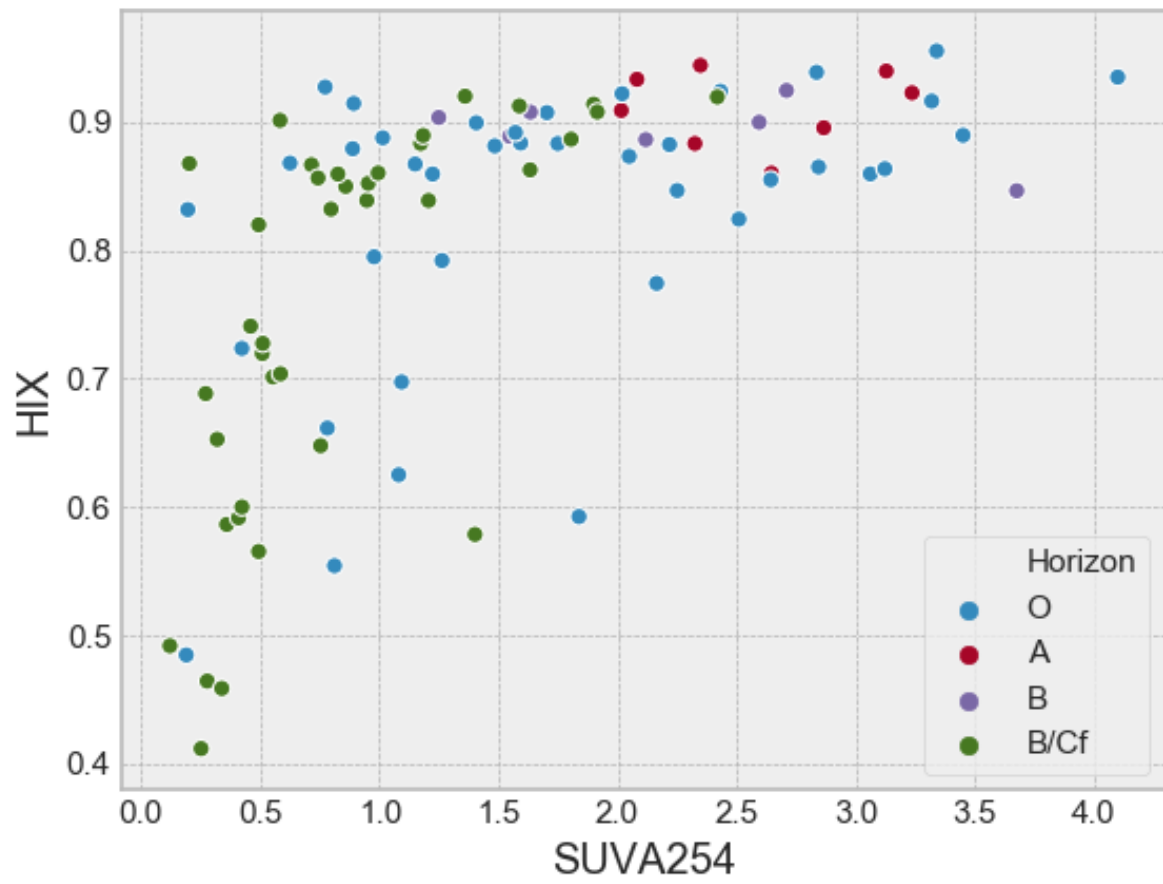

Figure S15. HIX vs SUVA254 for pore water samples.

## Supplementary Tables

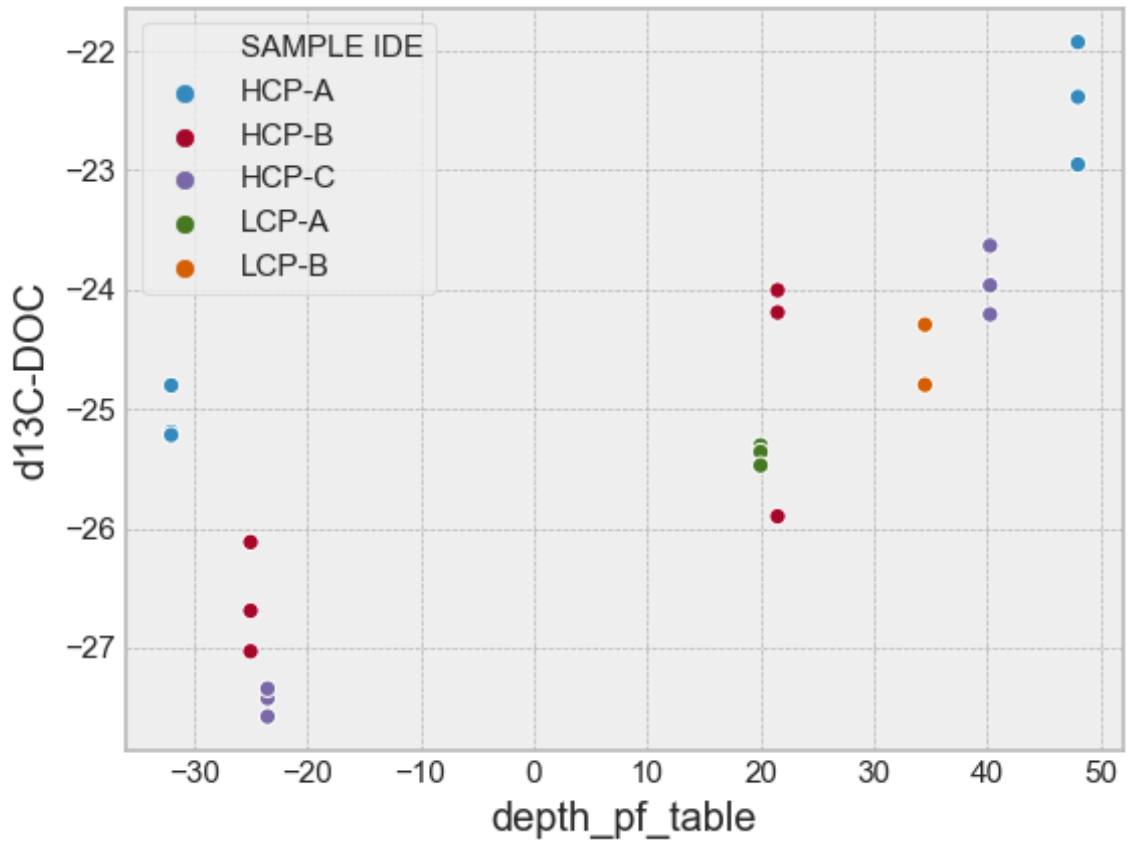

Figure S16. Values of  $\delta^{13}\text{C-DOC}$  at T=0 for the incubated pore water samples from 5 different sources.

# Supplementary Tables

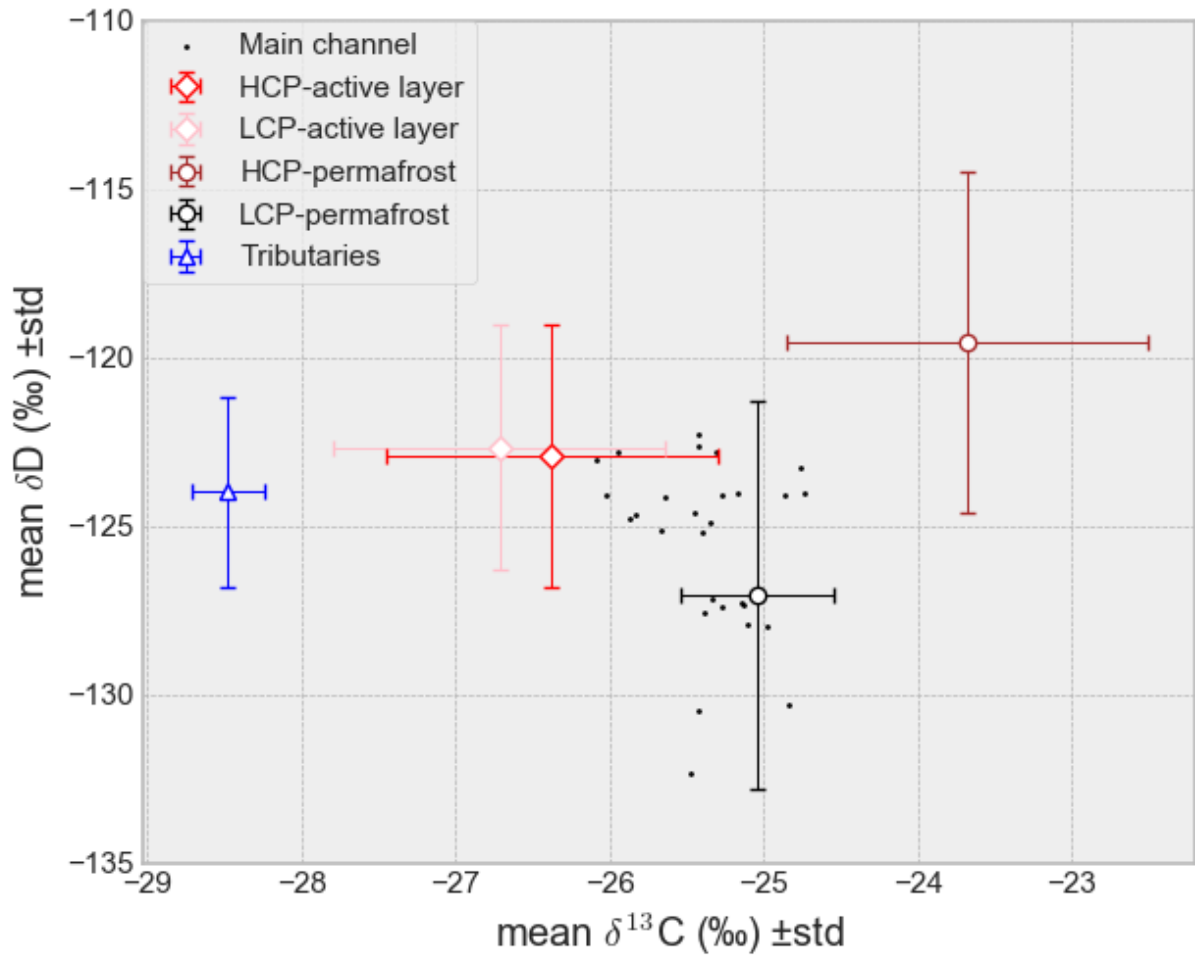

Figure S17. Location of sample sources in isotopic space.

## Supplementary Tables

|                                                                           |    |
|---------------------------------------------------------------------------|----|
| TABLE S1. CONDENSED WEATHER STATISTICS DURING MONITORING PERIOD           | 20 |
| TABLE S2. 3-HOUR AGGREGATED AQUAPROBE MEASUREMENT AT OUTLET               | 21 |
| TABLE S3. MEASURED BIOGEOCHEMICAL PARAMETERS OF INCUBATED SOIL SAMPLES    | 26 |
| TABLE S4. BULK POREWATER SAMPLES BIOGEOCHEMICAL PARAMETERS                | 30 |
| TABLE S5. INCUBATED TRIBUTARY STREAM WATER DOC AND POC                    | 36 |
| TABLE S6. SIGNIFICANT SPECTRAL INDICES BY LANDSCAPE CLASS                 | 39 |
| TABLE S7. SENSITIVITY ANALYSIS OF EMMA FOR PERMAFROST MEANS               | 40 |
| TABLE S8. SENSITIVITY ANALYSIS OF EMMA FOR PERMAFROST STANDARD DEVIATIONS | 41 |
| TABLE S9. TIMESERIES OF TRACER VALUES AND COMPUTED SOURCE FRACTIONS       | 42 |

## Supplementary Tables

Table S1. Condensed weather statistics in Black Creek catchment during monitoring period.

| <b>Date</b> | <b>P (mm)</b> | <b>T<sub>min</sub> (°C)</b> | <b>T<sub>max</sub> (°C)</b> | <b>T<sub>mean</sub> (°C)</b> | <b>Wind max (m/s)</b> | <b>Wind mean (m/s)</b> |
|-------------|---------------|-----------------------------|-----------------------------|------------------------------|-----------------------|------------------------|
| 2018-08-08  | 0.00          | 3.03                        | 5.98                        | 5.00                         | 3.49                  | 2.33                   |
| 2018-08-09  | 0.00          | 2.52                        | 5.23                        | 3.87                         | 6.51                  | 3.55                   |
| 2018-08-10  | 0.00          | 2.95                        | 6.50                        | 4.27                         | 8.01                  | 5.00                   |
| 2018-08-11  | 0.30          | 2.40                        | 7.21                        | 4.24                         | 10.07                 | 5.46                   |
| 2018-08-12  | 0.00          | 0.53                        | 6.21                        | 4.23                         | 4.55                  | 2.72                   |
| 2018-08-13  | 1.60          | 0.61                        | 4.65                        | 2.65                         | 7.70                  | 5.46                   |
| 2018-08-14  | 0.20          | -0.21                       | 5.15                        | 2.22                         | 11.12                 | 7.77                   |
| 2018-08-15  | 0.00          | -0.18                       | 9.49                        | 4.77                         | 5.95                  | 2.80                   |
| 2018-08-16  | 2.60          | 5.62                        | 10.48                       | 7.57                         | 9.81                  | 4.19                   |
| 2018-08-17  | 1.30          | 0.74                        | 7.96                        | 2.94                         | 15.06                 | 8.90                   |
| 2018-08-18  | 1.80          | -0.75                       | 6.65                        | 1.83                         | 5.49                  | 2.82                   |
| 2018-08-19  | 2.00          | 7.29                        | 12.71                       | 9.81                         | 8.04                  | 4.79                   |





## Supplementary Tables

|               |       |         |      |       |      |       |       |       |       |        |       |        |      |      |        |        |      |         |      |
|---------------|-------|---------|------|-------|------|-------|-------|-------|-------|--------|-------|--------|------|------|--------|--------|------|---------|------|
| 8/12/18 06:00 | 6.51  | 1016.67 | 0.13 | 38.98 | 6.74 | 86.61 | 10.67 | 93.69 | 60.58 | 151.01 | -     | -      | -    | -    | -      | -      | -    | -       | -    |
| 8/12/18 09:00 | 6.14  | 1016.00 | 0.12 | 38.65 | 6.83 | 85.15 | 10.56 | 94.47 | 60.83 | 148.52 | -     | -      | -    | -    | -      | -      | -    | -       | -    |
| 8/12/18 12:00 | 6.55  | 1015.33 | 0.12 | 34.69 | 6.92 | 87.05 | 10.69 | 94.33 | 60.89 | 149.79 | -     | -      | -    | -    | -      | -      | -    | -       | -    |
| 8/12/18 15:00 | 7.78  | 1014.22 | 0.12 | 28.76 | 6.94 | 91.18 | 10.85 | 93.78 | 60.50 | 151.57 | -     | -      | -    | -    | -      | -      | -    | -       | -    |
| 8/12/18 18:00 | 9.41  | 1012.17 | 0.12 | 27.44 | 6.93 | 94.91 | 10.83 | 93.89 | 60.69 | 157.39 | -     | -      | -    | -    | -      | -      | -    | -       | -    |
| 8/12/18 21:00 | 10.19 | 1009.00 | 0.12 | 32.06 | 6.92 | 94.51 | 10.55 | 94.11 | 60.83 | 160.02 | -     | -      | -    | -    | -      | -      | -    | -       | -    |
| 8/13/18 00:00 | 9.69  | 1005.89 | 0.12 | 36.01 | 6.89 | 90.50 | 10.20 | 94.14 | 60.75 | 157.98 | -     | -      | -    | -    | -      | -      | -    | -       | -    |
| 8/13/18 03:00 | 8.52  | 1003.83 | 0.12 | 36.67 | 6.83 | 86.37 | 9.98  | 95.42 | 61.50 | 151.80 | -     | -      | -    | -    | -      | -      | -    | -       | -    |
| 8/13/18 06:00 | 7.77  | 1002.94 | 0.12 | 31.73 | 6.78 | 83.98 | 9.88  | 95.81 | 61.81 | 147.69 | -     | -      | -    | -    | -      | -      | -    | -       | -    |
| 8/13/18 09:00 | 7.26  | 1003.00 | 0.12 | 32.72 | 6.78 | 82.48 | 9.83  | 96.69 | 62.47 | 142.92 | -     | -      | -    | -    | -      | -      | -    | -       | -    |
| 8/13/18 12:00 | 6.64  | 1004.00 | 0.12 | 36.01 | 6.78 | 83.46 | 10.10 | 97.31 | 62.86 | 141.34 | -     | -      | -    | -    | -      | -      | -    | -       | -    |
| 8/13/18 15:00 | 6.32  | 1005.18 | 0.05 | 34.26 | 6.86 | 89.70 | 10.97 | 95.89 | 61.95 | 137.97 | 17.49 | -25.67 | 0.61 | 0.33 | -30.15 | -16.02 | 0.06 | -125.15 | 0.44 |
| 8/13/18 18:00 | 6.39  | 1006.75 | 0.12 | 34.69 | 6.92 | 91.39 | 11.17 | 94.75 | 61.17 | 140.52 | -     | -      | -    | -    | -      | -      | -    | -       | -    |
| 8/13/18 21:00 | 6.22  | 1007.36 | 0.12 | 36.34 | 6.90 | 91.54 | 11.24 | 93.56 | 60.36 | 137.89 | 17.64 | -25.40 | 0.02 | 0.28 | -29.88 | -15.97 | 0.04 | -125.20 | 0.24 |
| 8/14/18 00:00 | 5.45  | 1009.47 | 0.11 | 20.85 | 6.80 | 88.84 | 11.15 | 94.14 | 60.75 | 135.59 | -     | -      | -    | -    | -      | -      | -    | -       | -    |
| 8/14/18 03:00 | 4.39  | 1010.36 | 0.11 | 22.50 | 6.70 | 86.81 | 11.21 | 94.94 | 61.33 | 136.33 | 17.26 | -25.84 | 0.39 | 0.29 | -29.60 | -16.00 | 0.09 | -124.68 | 0.32 |
| 8/14/18 06:00 | 3.70  | 1011.00 | 0.11 | 21.84 | 6.73 | 86.04 | 11.32 | 94.94 | 61.19 | 134.26 | -     | -      | -    | -    | -      | -      | -    | -       | -    |
| 8/14/18 09:00 | 3.13  | 1011.58 | 0.11 | 20.52 | 6.77 | 86.11 | 11.51 | 95.81 | 61.89 | 132.15 | 17.28 | -25.46 | 0.74 | 0.37 | -29.91 | -15.98 | 0.01 | -124.60 | 0.08 |
| 8/14/18 12:00 | 3.03  | 1011.61 | 0.11 | 20.19 | 6.93 | 89.48 | 11.99 | 95.00 | 61.31 | 129.17 | -     | -      | -    | -    | -      | -      | -    | -       | -    |
| 8/14/18 15:00 | 4.03  | 1012.53 | 0.11 | 16.89 | 7.00 | 93.87 | 12.26 | 94.83 | 61.22 | 134.27 | 17.17 | -25.64 | 1.91 | 0.50 | -30.28 | -15.84 | 0.02 | -124.15 | 0.33 |
| 8/14/18 18:00 | 6.07  | 1013.08 | 0.04 | 20.50 | 6.99 | 98.42 | 12.22 | 95.51 | 61.68 | 136.82 | -     | -      | -    | -    | -      | -      | -    | -       | -    |
| 8/14/18 21:00 | 6.85  | 1013.00 | 0.11 | 21.18 | 6.98 | 93.89 | 11.43 | 95.67 | 61.78 | 139.92 | 17.01 | -24.86 | 0.40 | 0.28 | -29.48 | -15.81 | 0.01 | -124.08 | 0.22 |
| 8/15/18 00:00 | 6.39  | 1012.47 | 0.11 | 21.84 | 6.95 | 91.09 | 11.20 | 96.44 | 62.28 | 139.10 | -     | -      | -    | -    | -      | -      | -    | -       | -    |
| 8/15/18 03:00 | 5.53  | 1011.72 | 0.11 | 20.19 | 6.88 | 88.07 | 11.05 | 97.25 | 62.92 | 134.43 | 17.29 | -26.02 | 0.67 | 0.24 | -29.99 | -15.79 | 0.03 | -124.06 | 0.11 |
| 8/15/18 06:00 | 4.58  | 1010.56 | 0.11 | 20.52 | 6.76 | 85.99 | 11.06 | 97.08 | 62.72 | 129.84 | -     | -      | -    | -    | -      | -      | -    | -       | -    |
| 8/15/18 09:00 | 3.86  | 1009.03 | 0.11 | 24.80 | 6.78 | 84.63 | 11.06 | 98.06 | 63.42 | 127.85 | 16.94 | -24.73 | 0.48 | 0.26 | -29.41 | -15.77 | 0.04 | -124.02 | 0.21 |
| 8/15/18 12:00 | 4.24  | 1006.89 | 0.12 | 28.43 | 6.91 | 87.01 | 11.24 | 97.58 | 63.00 | 128.99 | -     | -      | -    | -    | -      | -      | -    | -       | -    |
| 8/15/18 15:00 | 6.18  | 1003.95 | 0.05 | 29.27 | 6.93 | 92.01 | 11.28 | 97.08 | 62.76 | 132.71 | 17.27 | -25.87 | 0.14 | 0.26 | -29.66 | -15.89 | 0.06 | -124.79 | 0.05 |



## Supplementary Tables

|               |      |         |      |        |      |       |       |          |          |        |       |        |       |      |        |        |      |         |      |
|---------------|------|---------|------|--------|------|-------|-------|----------|----------|--------|-------|--------|-------|------|--------|--------|------|---------|------|
| 8/15/18 18:00 | 8.15 | 1000.64 | 0.11 | 20.19  | 6.92 | 94.04 | 10.94 | 97.83    | 63.17    | 137.94 | -     | -      | -     | -    | -      | -      | -    | -       |      |
| 8/15/18 21:00 | 8.39 | 997.64  | 0.11 | 20.19  | 6.90 | 90.58 | 10.44 | 97.97    | 63.28    | 137.05 | 17.10 | -25.48 | 0.92  | 0.31 | -29.83 | -17.11 | 0.06 | -132.36 | 0.33 |
| 8/16/18 00:00 | 7.86 | 997.00  | 0.11 | 24.80  | 6.87 | 87.19 | 10.18 | 98.36    | 63.61    | 133.65 | -     | -      | -     | -    | -      | -      | -    | -       | -    |
| 8/16/18 03:00 | 7.40 | 996.92  | 0.11 | 22.50  | 6.84 | 84.74 | 10.01 | 98.56    | 63.69    | 136.13 | 17.22 | -25.17 | 0.67  | 0.30 | -29.62 | -15.79 | 0.03 | -124.02 | 0.19 |
| 8/16/18 06:00 | 7.17 | 995.94  | 0.19 | 115.79 | 6.88 | 86.01 | 10.13 | 3340.39  | 2170.89  | 116.27 | -     | -      | -     | -    | -      | -      | -    | -       | -    |
| 8/16/18 09:00 | 7.44 | 995.00  | 0.29 | 238.10 | 7.52 | 96.32 | 10.93 | 17339.64 | 11270.31 | 44.47  | 5.04  | -25.48 | 24.34 | 0.72 | -29.51 | -11.94 | 0.01 | -94.38  | 0.09 |
| 8/16/18 12:00 | 7.12 | 996.75  | 0.21 | 139.53 | 7.46 | 90.19 | 10.49 | 9844.50  | 6398.44  | 79.08  | -     | -      | -     | -    | -      | -      | -    | -       | -    |
| 8/16/18 15:00 | 7.21 | 998.14  | 0.12 | 33.38  | 6.91 | 85.44 | 10.14 | 179.19   | 116.14   | 127.69 | 16.62 | -25.13 | 1.00  | 0.34 | -30.88 | -16.15 | 0.09 | -127.36 | 1.52 |
| 8/16/18 18:00 | 7.26 | 998.69  | 0.13 | 48.21  | 6.89 | 86.89 | 10.31 | 121.06   | 78.33    | 128.18 | -     | -      | -     | -    | -      | -      | -    | -       | -    |
| 8/16/18 21:00 | 7.48 | 997.78  | 0.16 | 75.90  | 6.89 | 86.88 | 10.24 | 113.17   | 73.00    | 129.31 | 16.83 | -25.35 | 0.72  | 0.42 | -29.81 | -15.93 | 0.02 | -124.91 | 0.06 |
| 8/17/18 00:00 | 7.59 | 995.50  | 0.12 | 34.69  | 6.86 | 86.06 | 10.10 | 115.25   | 74.33    | 128.66 | -     | -      | -     | -    | -      | -      | -    | -       | -    |
| 8/17/18 03:00 | 7.52 | 995.06  | 0.12 | 38.32  | 6.85 | 84.47 | 9.92  | 109.67   | 70.75    | 126.01 | 16.64 | -25.27 | 0.63  | 0.42 | -30.08 | -15.82 | 0.10 | -124.05 | 0.41 |
| 8/17/18 06:00 | 6.70 | 999.36  | 0.22 | 153.04 | 7.02 | 86.18 | 10.28 | 4539.94  | 2950.42  | 104.71 | -     | -      | -     | -    | -      | -      | -    | -       | -    |
| 8/17/18 09:00 | 5.77 | 1002.47 | 0.36 | 312.60 | 7.57 | 94.79 | 11.33 | 16479.75 | 10711.47 | 44.92  | 4.51  | -25.98 | 28.85 | 1.44 | -27.90 | -12.06 | 0.03 | -94.72  | 0.15 |
| 8/17/18 12:00 | 5.45 | 1004.06 | 0.28 | 219.64 | 7.64 | 94.38 | 11.42 | 15132.47 | 9835.58  | 43.73  | -     | -      | -     | -    | -      | -      | -    | -       | -    |
| 8/17/18 15:00 | 5.78 | 1005.94 | 0.20 | 124.36 | 7.13 | 92.52 | 11.47 | 480.56   | 311.83   | 113.93 | 16.10 | -25.42 | 1.71  | 0.43 | -27.72 | -15.60 | 0.13 | -122.28 | 0.77 |
| 8/17/18 18:00 | 6.56 | 1008.32 | 0.19 | 111.31 | 7.00 | 92.81 | 11.31 | 164.59   | 106.51   | 118.13 | -     | -      | -     | -    | -      | -      | -    | -       | -    |
| 8/17/18 21:00 | 6.29 | 1010.81 | 0.17 | 87.77  | 6.97 | 90.66 | 11.15 | 153.50   | 99.36    | 118.00 | 16.22 | -25.39 | 0.55  | 0.42 | -27.41 | -16.28 | 0.03 | -127.59 | 0.07 |
| 8/18/18 00:00 | 5.53 | 1012.58 | 0.12 | 30.74  | 6.87 | 87.80 | 11.04 | 151.06   | 97.69    | 112.71 | -     | -      | -     | -    | -      | -      | -    | -       | -    |
| 8/18/18 03:00 | 4.40 | 1014.14 | 0.11 | 17.55  | 6.74 | 85.57 | 11.09 | 131.36   | 84.92    | 104.62 | 16.23 | -24.98 | 1.11  | 0.40 | -28.25 | -16.05 | 0.08 | -127.99 | 0.18 |
| 8/18/18 06:00 | 3.73 | 1015.00 | 0.11 | 23.16  | 6.75 | 84.43 | 11.14 | 120.36   | 77.78    | 107.61 | -     | -      | -     | -    | -      | -      | -    | -       | -    |
| 8/18/18 09:00 | 3.44 | 1016.00 | 0.11 | 21.18  | 6.85 | 84.30 | 11.22 | 116.92   | 75.75    | 109.49 | 15.99 | -25.42 | 0.65  | 0.38 | -28.64 | -15.73 | 0.06 | -122.61 | 0.58 |
| 8/18/18 12:00 | 3.71 | 1015.83 | 0.11 | 19.20  | 6.93 | 86.31 | 11.40 | 112.61   | 72.69    | 109.67 | -     | -      | -     | -    | -      | -      | -    | -       | -    |
| 8/18/18 15:00 | 5.01 | 1015.03 | 0.11 | 25.46  | 6.94 | 90.33 | 11.53 | 110.83   | 71.56    | 115.13 | 16.12 | -24.76 | 0.55  | 0.36 | -28.99 | -15.68 | 0.06 | -123.26 | 0.26 |
| 8/18/18 18:00 | 6.38 | 1014.95 | 0.12 | 27.59  | 6.94 | 92.08 | 11.35 | 109.46   | 70.76    | 117.85 | -     | -      | -     | -    | -      | -      | -    | -       | -    |
| 8/18/18 21:00 | 6.55 | 1015.00 | 0.11 | 22.17  | 6.92 | 90.97 | 11.17 | 107.67   | 69.42    | 115.97 | 16.00 | -25.31 | 0.00  | 0.44 | -29.16 | -15.85 | 0.02 | -122.78 | 0.12 |
| 8/19/18 00:00 | 6.50 | 1014.86 | 0.11 | 22.50  | 6.90 | 89.54 | 11.01 | 108.72   | 70.17    | 116.20 | -     | -      | -     | -    | -      | -      | -    | -       | -    |
| 8/19/18 03:00 | 6.66 | 1015.03 | 0.11 | 26.45  | 6.90 | 88.34 | 10.82 | 107.56   | 69.44    | 112.68 | 15.69 | -26.08 | 0.72  | 0.37 | -29.16 | -15.76 | 0.05 | -123.05 | 0.11 |



## Supplementary Tables

Table S3. Measured biogeochemical parameters of incubated soil samples from active layer and permafrost.

| ID | Latitude   | Longitude    | DOC (mg/L) | $\delta^{13}\text{C}\text{-DOC}$ (‰) | $\delta^{13}\text{C}\text{-SOC}$ (‰) | Soil C:N | % SOC | T (days) | Layer        | Type | Location | Aliquot |
|----|------------|--------------|------------|--------------------------------------|--------------------------------------|----------|-------|----------|--------------|------|----------|---------|
| 1  | 69.4643753 | -139.0823216 | 59.60      | -25.19                               | -27.09                               | 18.29    | 40.67 | 0        | Active Layer | HCP  | A        | 1       |
| 2  | 69.4643753 | -139.0823216 | 59.73      | -24.80                               | -27.09                               | 18.29    | 40.67 | 0        | Active Layer | HCP  | A        | 2       |
| 3  | 69.4643753 | -139.0823216 | 62.59      | -25.22                               | -27.09                               | 18.29    | 40.67 | 0        | Active Layer | HCP  | A        | 3       |
| 4  | 69.4643753 | -139.0823216 | 46.71      | -25.59                               | -27.09                               | 18.29    | 40.67 | 3        | Active Layer | HCP  | A        | 1       |
| 5  | 69.4643753 | -139.0823216 | 49.68      | -25.47                               | -27.09                               | 18.29    | 40.67 | 3        | Active Layer | HCP  | A        | 2       |
| 6  | 69.4643753 | -139.0823216 | 50.97      | -25.91                               | -27.09                               | 18.29    | 40.67 | 3        | Active Layer | HCP  | A        | 3       |
| 7  | 69.4643753 | -139.0823216 | 44.08      | -25.91                               | -27.09                               | 18.29    | 40.67 | 7        | Active Layer | HCP  | A        | 1       |
| 8  | 69.4643753 | -139.0823216 | 45.60      | -25.58                               | -27.09                               | 18.29    | 40.67 | 7        | Active Layer | HCP  | A        | 2       |
| 9  | 69.4643753 | -139.0823216 | 46.96      | -25.80                               | -27.09                               | 18.29    | 40.67 | 7        | Active Layer | HCP  | A        | 3       |
| 10 | 69.4643753 | -139.0823216 | 37.32      | -25.56                               | -27.09                               | 18.29    | 40.67 | 21       | Active Layer | HCP  | A        | 1       |
| 11 | 69.4643753 | -139.0823216 | 39.11      | -24.97                               | -27.09                               | 18.29    | 40.67 | 21       | Active Layer | HCP  | A        | 2       |
| 12 | 69.4643753 | -139.0823216 | 39.34      | -25.43                               | -27.09                               | 18.29    | 40.67 | 21       | Active Layer | HCP  | A        | 3       |
| 13 | 69.4643336 | -139.0850596 | 80.35      | -26.12                               | -26.18                               | 52.33    | 45.54 | 0        | Active Layer | HCP  | B        | 1       |
| 14 | 69.4643336 | -139.0850596 | 83.94      | -26.69                               | -26.18                               | 52.33    | 45.54 | 0        | Active Layer | HCP  | B        | 2       |
| 15 | 69.4643336 | -139.0850596 | 90.58      | -27.03                               | -26.18                               | 52.33    | 45.54 | 0        | Active Layer | HCP  | B        | 3       |
| 16 | 69.4643336 | -139.0850596 | 74.51      | -26.17                               | -26.18                               | 52.33    | 45.54 | 3        | Active Layer | HCP  | B        | 1       |
| 17 | 69.4643336 | -139.0850596 | 77.72      | -26.30                               | -26.18                               | 52.33    | 45.54 | 3        | Active Layer | HCP  | B        | 2       |
| 18 | 69.4643336 | -139.0850596 | 79.27      | -26.21                               | -26.18                               | 52.33    | 45.54 | 3        | Active Layer | HCP  | B        | 3       |
| 19 | 69.4643336 | -139.0850596 | 78.96      | -26.31                               | -26.18                               | 52.33    | 45.54 | 7        | Active Layer | HCP  | B        | 1       |
| 20 | 69.4643336 | -139.0850596 | 79.37      | -26.12                               | -26.18                               | 52.33    | 45.54 | 7        | Active Layer | HCP  | B        | 2       |
| 21 | 69.4643336 | -139.0850596 | 80.06      | -26.58                               | -26.18                               | 52.33    | 45.54 | 7        | Active Layer | HCP  | B        | 3       |
| 22 | 69.4643336 | -139.0850596 | 75.16      | -26.35                               | -26.18                               | 52.33    | 45.54 | 21       | Active Layer | HCP  | B        | 1       |
| 23 | 69.4643336 | -139.0850596 | 76.10      | -26.16                               | -26.18                               | 52.33    | 45.54 | 21       | Active Layer | HCP  | B        | 2       |
| 24 | 69.4643336 | -139.0850596 | 78.91      | -26.27                               | -26.18                               | 52.33    | 45.54 | 21       | Active Layer | HCP  | B        | 3       |
| 25 | 69.4646868 | -139.0869958 | 81.28      | -27.58                               | -28.16                               | 42.92    | 48.33 | 0        | Active Layer | HCP  | C        | 1       |

## Supplementary Tables

|    |            |              |        |        |        |       |       |    |              |     |   |   |
|----|------------|--------------|--------|--------|--------|-------|-------|----|--------------|-----|---|---|
| 26 | 69.4646868 | -139.0869958 | 81.40  | -27.42 | -28.16 | 42.92 | 48.33 | 0  | Active Layer | HCP | C | 2 |
| 27 | 69.4646868 | -139.0869958 | 85.98  | -27.34 | -28.16 | 42.92 | 48.33 | 0  | Active Layer | HCP | C | 3 |
| 28 | 69.4646868 | -139.0869958 | 75.70  | -26.75 | -28.16 | 42.92 | 48.33 | 3  | Active Layer | HCP | C | 1 |
| 29 | 69.4646868 | -139.0869958 | 82.60  | -26.98 | -28.16 | 42.92 | 48.33 | 3  | Active Layer | HCP | C | 2 |
| 30 | 69.4646868 | -139.0869958 | 82.96  | -27.01 | -28.16 | 42.92 | 48.33 | 3  | Active Layer | HCP | C | 3 |
| 31 | 69.4646868 | -139.0869958 | 74.54  | -27.44 | -28.16 | 42.92 | 48.33 | 7  | Active Layer | HCP | C | 1 |
| 32 | 69.4646868 | -139.0869958 | 76.57  | -27.07 | -28.16 | 42.92 | 48.33 | 7  | Active Layer | HCP | C | 2 |
| 33 | 69.4646868 | -139.0869958 | 79.27  | -27.40 | -28.16 | 42.92 | 48.33 | 7  | Active Layer | HCP | C | 3 |
| 34 | 69.4646868 | -139.0869958 | 76.28  | -27.24 | -28.16 | 42.92 | 48.33 | 21 | Active Layer | HCP | C | 1 |
| 35 | 69.4646868 | -139.0869958 | 77.61  | -27.12 | -28.16 | 42.92 | 48.33 | 21 | Active Layer | HCP | C | 2 |
| 36 | 69.4646868 | -139.0869958 | 80.16  | -26.89 | -28.16 | 42.92 | 48.33 | 21 | Active Layer | HCP | C | 3 |
| 37 | 69.4643753 | -139.0823216 | 259.42 | -22.38 | -24.82 | 17.00 | 9.35  | 0  | Permafrost   | HCP | A | 1 |
| 38 | 69.4643753 | -139.0823216 | 264.26 | -22.95 | -24.82 | 17.00 | 9.35  | 0  | Permafrost   | HCP | A | 2 |
| 39 | 69.4643753 | -139.0823216 | 266.61 | -21.92 | -24.82 | 17.00 | 9.35  | 0  | Permafrost   | HCP | A | 3 |
| 40 | 69.4643753 | -139.0823216 | 248.48 | -22.72 | -24.82 | 17.00 | 9.35  | 3  | Permafrost   | HCP | A | 1 |
| 41 | 69.4643753 | -139.0823216 | 255.53 | -22.53 | -24.82 | 17.00 | 9.35  | 3  | Permafrost   | HCP | A | 2 |
| 42 | 69.4643753 | -139.0823216 | 269.88 | -22.57 | -24.82 | 17.00 | 9.35  | 3  | Permafrost   | HCP | A | 3 |
| 43 | 69.4643753 | -139.0823216 | 263.06 | -22.72 | -24.82 | 17.00 | 9.35  | 7  | Permafrost   | HCP | A | 1 |
| 44 | 69.4643753 | -139.0823216 | 266.46 | -22.61 | -24.82 | 17.00 | 9.35  | 7  | Permafrost   | HCP | A | 2 |
| 45 | 69.4643753 | -139.0823216 | 289.52 | -23.04 | -24.82 | 17.00 | 9.35  | 7  | Permafrost   | HCP | A | 3 |
| 46 | 69.4643753 | -139.0823216 | 258.13 | -22.48 | -24.82 | 17.00 | 9.35  | 21 | Permafrost   | HCP | A | 1 |
| 47 | 69.4643753 | -139.0823216 | 266.99 | -22.63 | -24.82 | 17.00 | 9.35  | 21 | Permafrost   | HCP | A | 2 |
| 48 | 69.4643753 | -139.0823216 | 270.02 | -22.42 | -24.82 | 17.00 | 9.35  | 21 | Permafrost   | HCP | A | 3 |
| 49 | 69.4652187 | -139.0847762 | 105.16 | -25.30 | -27.60 | 25.12 | 46.57 | 0  | Permafrost   | LCP | A | 1 |
| 50 | 69.4652187 | -139.0847762 | 106.50 | -25.36 | -27.60 | 25.12 | 46.57 | 0  | Permafrost   | LCP | A | 2 |
| 51 | 69.4652187 | -139.0847762 | 109.62 | -25.47 | -27.60 | 25.12 | 46.57 | 0  | Permafrost   | LCP | A | 3 |
| 52 | 69.4652187 | -139.0847762 | 101.35 | -25.55 | -27.60 | 25.12 | 46.57 | 3  | Permafrost   | LCP | A | 1 |
| 53 | 69.4652187 | -139.0847762 | 105.37 | -25.27 | -27.60 | 25.12 | 46.57 | 3  | Permafrost   | LCP | A | 2 |

## Supplementary Tables

|    |            |              |        |        |        |       |       |    |            |     |   |   |
|----|------------|--------------|--------|--------|--------|-------|-------|----|------------|-----|---|---|
| 54 | 69.4652187 | -139.0847762 | 119.77 | -26.47 | -27.60 | 25.12 | 46.57 | 3  | Permafrost | LCP | A | 3 |
| 55 | 69.4652187 | -139.0847762 | 102.88 | -25.38 | -27.60 | 25.12 | 46.57 | 7  | Permafrost | LCP | A | 1 |
| 56 | 69.4652187 | -139.0847762 | 103.61 | -25.54 | -27.60 | 25.12 | 46.57 | 7  | Permafrost | LCP | A | 2 |
| 57 | 69.4652187 | -139.0847762 | 103.96 | -25.36 | -27.60 | 25.12 | 46.57 | 7  | Permafrost | LCP | A | 3 |
| 58 | 69.4652187 | -139.0847762 | 96.41  | -25.40 | -27.60 | 25.12 | 46.57 | 21 | Permafrost | LCP | A | 1 |
| 59 | 69.4652187 | -139.0847762 | 98.96  | -25.48 | -27.60 | 25.12 | 46.57 | 21 | Permafrost | LCP | A | 2 |
| 60 | 69.4652187 | -139.0847762 | 98.97  | -25.29 | -27.60 | 25.12 | 46.57 | 21 | Permafrost | LCP | A | 3 |
| 61 | 69.4643336 | -139.0850596 | 258.32 | -24.00 | -26.47 | 18.86 | 19.76 | 0  | Permafrost | HCP | B | 1 |
| 62 | 69.4643336 | -139.0850596 | 261.19 | -24.19 | -26.47 | 18.86 | 19.76 | 0  | Permafrost | HCP | B | 2 |
| 63 | 69.4643336 | -139.0850596 | 329.76 | -25.90 | -26.47 | 18.86 | 19.76 | 0  | Permafrost | HCP | B | 3 |
| 64 | 69.4643336 | -139.0850596 | 248.06 | -24.44 | -26.47 | 18.86 | 19.76 | 3  | Permafrost | HCP | B | 1 |
| 65 | 69.4643336 | -139.0850596 | 263.23 | -24.60 | -26.47 | 18.86 | 19.76 | 3  | Permafrost | HCP | B | 2 |
| 66 | 69.4643336 | -139.0850596 | 283.68 | -25.06 | -26.47 | 18.86 | 19.76 | 3  | Permafrost | HCP | B | 3 |
| 67 | 69.4643336 | -139.0850596 | 242.01 | -24.39 | -26.47 | 18.86 | 19.76 | 7  | Permafrost | HCP | B | 1 |
| 68 | 69.4643336 | -139.0850596 | 252.11 | -24.25 | -26.47 | 18.86 | 19.76 | 7  | Permafrost | HCP | B | 2 |
| 69 | 69.4643336 | -139.0850596 | 253.15 | -24.31 | -26.47 | 18.86 | 19.76 | 7  | Permafrost | HCP | B | 3 |
| 70 | 69.4643336 | -139.0850596 | 241.17 | -24.32 | -26.47 | 18.86 | 19.76 | 21 | Permafrost | HCP | B | 1 |
| 71 | 69.4643336 | -139.0850596 | 250.20 | -24.43 | -26.47 | 18.86 | 19.76 | 21 | Permafrost | HCP | B | 2 |
| 72 | 69.4643336 | -139.0850596 | 263.14 | -24.49 | -26.47 | 18.86 | 19.76 | 21 | Permafrost | HCP | B | 3 |
| 73 | 69.4653797 | -139.0847363 | 188.67 | -24.29 | -25.63 | 18.42 | 9.05  | 0  | Permafrost | LCP | B | 1 |
| 74 | 69.4653797 | -139.0847363 | 212.93 | -24.80 | -25.63 | 18.42 | 9.05  | 0  | Permafrost | LCP | B | 2 |
| 75 | 69.4653797 | -139.0847363 | 192.87 | -24.39 | -25.63 | 18.42 | 9.05  | 3  | Permafrost | LCP | B | 1 |
| 76 | 69.4653797 | -139.0847363 | 193.33 | -23.99 | -25.63 | 18.42 | 9.05  | 3  | Permafrost | LCP | B | 2 |
| 77 | 69.4653797 | -139.0847363 | 201.11 | -24.30 | -25.63 | 18.42 | 9.05  | 3  | Permafrost | LCP | B | 3 |
| 78 | 69.4653797 | -139.0847363 | 182.25 | -24.13 | -25.63 | 18.42 | 9.05  | 7  | Permafrost | LCP | B | 1 |
| 79 | 69.4653797 | -139.0847363 | 191.42 | -24.13 | -25.63 | 18.42 | 9.05  | 7  | Permafrost | LCP | B | 2 |
| 80 | 69.4653797 | -139.0847363 | 193.47 | -24.16 | -25.63 | 18.42 | 9.05  | 7  | Permafrost | LCP | B | 3 |
| 81 | 69.4653797 | -139.0847363 | 186.21 | -23.99 | -25.63 | 18.42 | 9.05  | 21 | Permafrost | LCP | B | 1 |

## Supplementary Tables

|    |            |              |        |        |        |       |       |    |            |     |   |   |
|----|------------|--------------|--------|--------|--------|-------|-------|----|------------|-----|---|---|
| 82 | 69.4653797 | -139.0847363 | 190.23 | -24.19 | -25.63 | 18.42 | 9.05  | 21 | Permafrost | LCP | B | 2 |
| 83 | 69.4653797 | -139.0847363 | 191.90 | -24.97 | -25.63 | 18.42 | 9.05  | 21 | Permafrost | LCP | B | 3 |
| 84 | 69.4646868 | -139.0869958 | 301.26 | -23.63 | -26.97 | 19.87 | 17.87 | 0  | Permafrost | HCP | C | 1 |
| 85 | 69.4646868 | -139.0869958 | 301.27 | -23.96 | -26.97 | 19.87 | 17.87 | 0  | Permafrost | HCP | C | 2 |
| 86 | 69.4646868 | -139.0869958 | 316.90 | -24.21 | -26.97 | 19.87 | 17.87 | 0  | Permafrost | HCP | C | 3 |
| 87 | 69.4646868 | -139.0869958 | 305.18 | -23.74 | -26.97 | 19.87 | 17.87 | 3  | Permafrost | HCP | C | 1 |
| 88 | 69.4646868 | -139.0869958 | 306.63 | -24.17 | -26.97 | 19.87 | 17.87 | 3  | Permafrost | HCP | C | 2 |
| 89 | 69.4646868 | -139.0869958 | 297.33 | -23.83 | -26.97 | 19.87 | 17.87 | 7  | Permafrost | HCP | C | 1 |
| 90 | 69.4646868 | -139.0869958 | 302.97 | -23.31 | -26.97 | 19.87 | 17.87 | 7  | Permafrost | HCP | C | 2 |
| 91 | 69.4646868 | -139.0869958 | 304.04 | -23.67 | -26.97 | 19.87 | 17.87 | 7  | Permafrost | HCP | C | 3 |
| 92 | 69.4646868 | -139.0869958 | 288.81 | -23.85 | -26.97 | 19.87 | 17.87 | 21 | Permafrost | HCP | C | 1 |
| 93 | 69.4646868 | -139.0869958 | 292.69 | -23.83 | -26.97 | 19.87 | 17.87 | 21 | Permafrost | HCP | C | 2 |
| 94 | 69.4646868 | -139.0869958 | 292.98 | -23.82 | -26.97 | 19.87 | 17.87 | 21 | Permafrost | HCP | C | 3 |

## Supplementary Tables

Table S4. Bulk porewater samples biogeochemical parameters.

| ID | Latitude  | Longitude  | DOC (mg/L) | $\delta^{13}\text{C-SOC}$ (‰) | Soil C:N | % SOC | DOC yield (mg/gC) | DOC yield (mg/g soil) | DN (mg/L) | Layer        | Type | Z <sub>min</sub> (cm) | Z <sub>max</sub> (cm) | Z <sub>average</sub> (cm) | Z <sub>AL</sub> (cm) |
|----|-----------|------------|------------|-------------------------------|----------|-------|-------------------|-----------------------|-----------|--------------|------|-----------------------|-----------------------|---------------------------|----------------------|
| 1  | 69.46312  | -139.11214 | 54.65      | -                             | -        | 25.56 | 0.16              | 0.16                  | 1.88      | Active Layer | HCP  | 0                     | 4                     | 2                         | 31                   |
| 2  | 69.461795 | -139.11132 | 84.64      | -                             | -        | 34.91 | 1.44              | 0.59                  | 3.84      | Active Layer | flat | 0                     | 10                    | 5                         | 26                   |
| 3  | 69.464537 | -139.12584 | 172.30     | -27.61                        | 16.12    | 9.49  | 5.99              | 0.57                  | 15.25     | Permafrost   | LCP  | 90                    | 100                   | 95                        | 41                   |
| 4  | 69.470917 | -139.09987 | 116.91     | -27.40                        | 19.54    | 23.08 | 7.08              | 0.29                  | 2.99      | Permafrost   | HCP  | 22                    | 31                    | 26.5                      | 14                   |
| 5  | 69.470917 | -139.09987 | 66.02      | -27.62                        | 21.25    | 28.70 | 0.30              | 0.15                  | 6.09      | Active Layer | HCP  | 0                     | 26                    | 13                        | 14                   |
| 6  | 69.470917 | -139.09987 | 130.12     | -27.37                        | 16.41    | 15.18 | -                 | -                     | 8.30      | Permafrost   | HCP  | 31                    | 40                    | 35.5                      | 14                   |
| 7  | 69.469496 | -139.09508 | 150.21     | -27.84                        | 17.65    | 10.76 | 6.21              | 0.12                  | 7.09      | Active Layer | flat | 21                    | 27                    | 24                        | 38                   |
| 8  | 69.469496 | -139.09508 | 237.73     | -27.33                        | 15.13    | 6.56  | 3.39              | 0.18                  | 13.65     | Permafrost   | flat | 38                    | 45                    | 41.5                      | 38                   |
| 9  | 69.468503 | -139.09185 | 93.97      | -                             | -        | 33.94 | 0.39              | 0.64                  | 3.32      | Active Layer | LCP  | 0                     | 13                    | 6.5                       | 40                   |
| 10 | 69.468503 | -139.09185 | 52.00      | -                             | -        | 18.44 | 0.85              | 0.14                  | 1.36      | Active Layer | LCP  | 20                    | 25                    | 22.5                      | 40                   |
| 11 | 69.468503 | -139.09185 | 133.96     | -27.82                        | 14.34    | 14.48 | 0.87              | 0.17                  | 5.64      | Permafrost   | LCP  | 40                    | 50                    | 45                        | 40                   |
| 12 | 69.468503 | -139.09185 | 122.36     | -28.31                        | 16.67    | 12.61 | 2.07              | 0.32                  | 5.82      | Permafrost   | LCP  | 50                    | 60                    | 55                        | 40                   |
| 13 | 69.461795 | -139.11132 | 53.51      | -                             | -        | 36.21 | 0.59              | 0.08                  | 2.35      | Active Layer | flat | 10                    | 15                    | 12.5                      | 26                   |
| 14 | 69.468503 | -139.09185 | 139.15     | -27.98                        | 15.31    | 8.88  | 2.05              | 0.19                  | 7.84      | Permafrost   | LCP  | 60                    | 70                    | 65                        | 40                   |
| 15 | 69.468503 | -139.09185 | 101.68     | -25.52                        | 15.90    | 2.62  | 16.79             | 0.07                  | 8.27      | Permafrost   | LCP  | 70                    | 80                    | 75                        | 40                   |
| 16 | 69.470459 | -139.08953 | 71.83      | -28.44                        | 14.85    | 34.86 | -                 | -                     | 2.13      | Active Layer | LCP  | 5                     | 15                    | 10                        | 39                   |
| 17 | 69.470459 | -139.08953 | 205.07     | -27.86                        | 17.61    | 14.50 | 0.75              | 0.26                  | 11.86     | Permafrost   | LCP  | 39                    | 50                    | 44.5                      | 39                   |
| 18 | 69.470459 | -139.08953 | 249.74     | -27.19                        | 16.28    | 8.90  | 2.83              | 0.40                  | 16.29     | Permafrost   | LCP  | 50                    | 60                    | 55                        | 39                   |
| 19 | 69.464249 | -139.10818 | 81.71      | -28.30                        | 19.19    | 4.38  | 5.25              | 0.04                  | 2.77      | Active Layer | HCP  | 18                    | 24                    | 21                        | 33                   |
| 20 | 69.464249 | -139.10818 | 223.63     | -28.42                        | 18.00    | 10.39 | 4.54              | 0.24                  | 4.76      | Permafrost   | HCP  | 30                    | 40                    | 35                        | 33                   |
| 21 | 69.463682 | -139.10619 | 103.33     | -28.05                        | 19.21    | 33.83 | 2.68              | 0.24                  | 3.37      | Active Layer | LCP  | 16                    | 25                    | 20.5                      | 28                   |
| 22 | 69.463682 | -139.10619 | 244.10     | -27.96                        | 17.43    | 24.36 | 0.85              | 0.35                  | 11.04     | Permafrost   | LCP  | 29                    | 40                    | 34.5                      | 28                   |
| 23 | 69.461795 | -139.11132 | 139.52     | -                             | -        | 8.96  | 5.52              | 0.06                  | 9.02      | Active Layer | flat | 15                    | 21                    | 18                        | 26                   |
| 24 | 69.464697 | -139.10445 | 106.08     | -28.94                        | 33.23    | 40.60 | 0.14              | 1.99                  | 4.22      | Active Layer | HCP  | 1                     | 12                    | 6.5                       | 47                   |
| 25 | 69.464697 | -139.10445 | 147.87     | -28.01                        | 17.64    | 32.23 | 0.66              | 0.64                  | 4.86      | Permafrost   | HCP  | 47                    | 55                    | 51                        | 47                   |

## Supplementary Tables

|    |           |            |        |        |       |       |       |      |       |              |      |    |    |      |    |
|----|-----------|------------|--------|--------|-------|-------|-------|------|-------|--------------|------|----|----|------|----|
| 26 | 69.46523  | -139.10547 | 186.14 | -28.51 | 21.33 | 4.73  | 27.06 | 0.07 | 8.64  | Active Layer | HCP  | 20 | 26 | 23   | 32 |
| 27 | 69.46523  | -139.10547 | 154.75 | -27.95 | 20.44 | 15.76 | 1.42  | 0.14 | 10.89 | Permafrost   | HCP  | 30 | 40 | 35   | 32 |
| 28 | 69.462337 | -139.10825 | 112.12 | -28.70 | 20.23 | 8.04  | 1.10  | 0.06 | 5.60  | Active Layer | flat | 18 | 24 | 21   | 38 |
| 29 | 69.462337 | -139.10825 | 129.90 | -27.52 | 17.16 | 12.74 | 0.27  | 0.08 | 9.85  | Permafrost   | flat | 38 | 45 | 41.5 | 38 |
| 30 | 69.465811 | -139.1024  | 38.03  | -27.76 | 17.65 | 32.21 | 0.40  | 0.11 | 1.71  | Active Layer | HCP  | 21 | 26 | 23.5 | 23 |
| 31 | 69.465811 | -139.1024  | 96.57  | -28.31 | 16.11 | 12.11 | 1.80  | 0.06 | 6.93  | Permafrost   | HCP  | 35 | 47 | 41   | 23 |
| 32 | 69.466899 | -139.09549 | 57.84  | -27.14 | 15.49 | 3.03  | 7.12  | 0.03 | 1.94  | Active Layer | HCP  | 14 | 24 | 19   | 30 |
| 33 | 69.466899 | -139.09549 | 33.93  | -26.43 | 14.99 | 17.52 | 0.76  | 0.10 | 1.79  | Active Layer | HCP  | 16 | 24 | 20   | 30 |
| 34 | 69.461795 | -139.11132 | 174.28 | -28.44 | 17.77 | 16.86 | 0.20  | 0.01 | 13.94 | Permafrost   | flat | 30 | 40 | 35   | 26 |
| 35 | 69.466899 | -139.09549 | 58.77  | -      | -     | 6.84  | 1.73  | 0.04 | 2.85  | Active Layer | HCP  | 25 | 31 | 28   | 30 |
| 36 | 69.466899 | -139.09549 | 119.75 | -26.67 | 18.51 | 23.31 | 0.52  | 0.34 | 6.36  | Permafrost   | HCP  | 40 | 50 | 45   | 30 |
| 37 | 69.468558 | -139.10306 | 92.59  | -27.49 | 34.31 | 39.86 | 0.15  | 0.57 | 3.38  | Active Layer | HCP  | 4  | 12 | 8    | 32 |
| 38 | 69.468558 | -139.10306 | 218.57 | -28.01 | 19.97 | 12.84 | 2.29  | 0.20 | 6.69  | Active Layer | HCP  | 11 | 17 | 14   | 32 |
| 39 | 69.468558 | -139.10306 | 100.91 | -28.09 | 18.85 | 25.65 | 1.19  | 0.22 | 10.17 | Active Layer | HCP  | 17 | 21 | 19   | 32 |
| 40 | 69.468558 | -139.10306 | 145.76 | -27.22 | 16.41 | 24.82 | 1.32  | 0.39 | 7.97  | Permafrost   | HCP  | 30 | 40 | 35   | 32 |
| 41 | 69.468558 | -139.10306 | 160.39 | -27.35 | 15.59 | 16.87 | 0.90  | 0.25 | 8.06  | Permafrost   | HCP  | 40 | 43 | 41.5 | 32 |
| 42 | 69.468558 | -139.10306 | 8.66   | -      | -     | -     | -     | -    | 1.03  | Permafrost   | HCP  | 43 | 50 | 46.5 | 32 |
| 43 | 69.468558 | -139.10306 | 9.04   | -      | -     | -     | -     | -    | 1.05  | Permafrost   | HCP  | 50 | 60 | 55   | 32 |
| 44 | 69.469868 | -139.08165 | 68.06  | -27.02 | 17.77 | 19.96 | 0.43  | 0.09 | 3.87  | Active Layer | HCP  | 22 | 26 | 24   | 29 |
| 45 | 69.461795 | -139.11132 | 359.55 | -27.53 | 20.17 | 21.54 | 0.56  | 0.49 | 26.00 | Permafrost   | flat | 40 | 50 | 45   | 26 |
| 46 | 69.469868 | -139.08165 | 196.64 | -27.30 | 14.77 | 28.80 | 1.04  | 0.40 | 12.44 | Permafrost   | HCP  | 30 | 40 | 35   | 29 |
| 47 | 69.463653 | -139.11571 | 96.00  | -28.23 | 18.93 | 15.92 | 3.99  | 0.12 | 4.51  | Active Layer | HCP  | 21 | 27 | 24   | 27 |
| 48 | 69.463653 | -139.11571 | 180.95 | -27.06 | 16.99 | 14.89 | 0.36  | 0.15 | 9.83  | Permafrost   | HCP  | 25 | 35 | 30   | 27 |
| 49 | 69.468184 | -139.12182 | 205.07 | -28.13 | 19.64 | 9.03  | 1.47  | 0.13 | 5.20  | Active Layer | HCP  | 11 | 17 | 14   | 32 |
| 50 | 69.470544 | -139.11677 | 12.12  | -      | -     | -     | -     | -    | 1.10  | Active Layer | flat | 55 | 65 | 60   | 28 |
| 51 | 69.466899 | -139.09549 | 65.71  | -27.47 | 16.29 | 19.66 | 0.11  | 0.09 | 3.21  | Permafrost   | HCP  | 29 | 40 | 34.5 | 30 |
| 52 | 69.461795 | -139.11132 | 69.70  | -28.16 | 18.86 | 16.56 | 1.06  | 0.76 | 8.99  | Permafrost   | flat | 50 | 60 | 55   | 26 |
| 53 | 69.461795 | -139.11132 | 15.42  | -28.58 | 20.12 | -     | -     | 1.56 | 1.50  | Permafrost   | flat | 61 | 70 | 65.5 | 26 |



## Supplementary Tables

|    |           |            |        |        |       |       |       |      |       |              |      |    |    |      |    |
|----|-----------|------------|--------|--------|-------|-------|-------|------|-------|--------------|------|----|----|------|----|
| 54 | 69.461143 | -139.11857 | 71.87  | -27.07 | 13.45 | 54.37 | 0.07  | 0.39 | 6.54  | Active Layer | LCP  | 17 | 21 | 19   | 31 |
| 55 | 69.461143 | -139.11857 | 137.13 | -27.74 | 22.94 | 26.77 | 0.53  | 0.29 | 7.77  | Permafrost   | LCP  | 35 | 45 | 40   | 31 |
| 56 | 69.461838 | -139.12411 | 162.31 | -27.48 | 16.04 | 11.03 | 4.49  | 0.15 | 4.43  | Active Layer | HCP  | 26 | 29 | 27.5 | 24 |
| 57 | 69.46312  | -139.11214 | 153.46 | -      | -     | 32.83 | 1.73  | 0.32 | 3.35  | Active Layer | HCP  | 4  | 9  | 6.5  | 31 |
| 58 | 69.461838 | -139.12411 | 125.36 | -27.89 | 18.01 | 15.15 | 1.41  | 0.05 | 7.60  | Permafrost   | HCP  | 25 | 35 | 30   | 24 |
| 59 | 69.464055 | -139.07269 | 81.53  | -26.62 | 16.86 | 6.82  | 3.73  | 0.08 | 1.99  | Active Layer | flat | 20 | 26 | 23   | 21 |
| 60 | 69.464055 | -139.07269 | 88.75  | -26.71 | 18.10 | 13.68 | 0.42  | 0.09 | 4.13  | Permafrost   | flat | 27 | 35 | 31   | 21 |
| 61 | 69.464769 | -139.08187 | 25.32  | -      | -     | 30.00 | 0.57  | 0.13 | 2.02  | Active Layer | LCP  | 0  | 8  | 4    | 31 |
| 62 | 69.463537 | -139.08477 | 118.05 | -27.90 | 19.28 | 7.65  | 3.92  | 0.08 | 5.87  | Active Layer | LCP  | 20 | 26 | 23   | 32 |
| 63 | 69.463537 | -139.08477 | 263.08 | -27.28 | 18.49 | 17.36 | 0.99  | 0.36 | 13.11 | Permafrost   | LCP  | 30 | 40 | 35   | 32 |
| 64 | 69.461369 | -139.07776 | 261.68 | -27.17 | 18.83 | 26.40 | 2.27  | 0.61 | 12.30 | Active Layer | LCP  | 22 | 28 | 25   | 30 |
| 65 | 69.461369 | -139.07776 | 63.82  | -27.14 | 19.57 | 36.85 | 0.02  | 0.15 | 2.57  | Permafrost   | LCP  | 30 | 40 | 35   | 30 |
| 66 | 69.459965 | -139.08298 | 112.18 | -28.65 | 20.29 | 2.68  | 45.12 | 0.05 | 5.15  | Active Layer | LCP  | 17 | 33 | 25   | 50 |
| 67 | 69.459965 | -139.08298 | 115.74 | -24.97 | 17.88 | 4.28  | 0.57  | 0.03 | 6.24  | Permafrost   | LCP  | 50 | 60 | 55   | 50 |
| 68 | 69.46312  | -139.11214 | 95.22  | -      | -     | 20.07 | 3.30  | 0.14 | 3.64  | Active Layer | HCP  | 15 | 24 | 19.5 | 31 |
| 69 | 69.462359 | -139.08324 | 63.78  | -      | -     | 36.44 | 0.13  | 0.37 | 7.88  | Active Layer | flat | 0  | 7  | 3.5  | 36 |
| 70 | 69.462359 | -139.08324 | 127.71 | -      | -     | 34.18 | 0.53  | 0.43 | 3.08  | Active Layer | flat | 6  | 14 | 10   | 36 |
| 71 | 69.462359 | -139.08324 | 192.62 | -      | -     | 12.95 | 3.43  | 0.15 | 7.71  | Active Layer | flat | 20 | 29 | 24.5 | 36 |
| 72 | 69.462359 | -139.08324 | 161.28 | -27.84 | 19.92 | 29.22 | 0.43  | 0.17 | 6.83  | Permafrost   | flat | 36 | 45 | 40.5 | 36 |
| 73 | 69.462359 | -139.08324 | 162.53 | -28.56 | 22.53 | 24.57 | 6.19  | 0.27 | 8.73  | Permafrost   | flat | 45 | 55 | 50   | 36 |
| 74 | 69.462359 | -139.08324 | -      | -      | -     | -     | -     | -    | -     | Permafrost   | flat | 55 | 65 | 60   | 36 |
| 75 | 69.46161  | -139.09193 | 130.55 | -28.27 | 17.95 | 3.90  | 11.09 | 0.07 | 5.60  | Active Layer | flat | 24 | 30 | 27   | 41 |
| 76 | 69.46161  | -139.09193 | 170.95 | -26.70 | 18.24 | 7.01  | 3.70  | 0.10 | 8.25  | Permafrost   | flat | 40 | 50 | 45   | 41 |
| 77 | 69.463993 | -139.09123 | 69.96  | -27.61 | 18.97 | 14.43 | 0.91  | 0.10 | 2.47  | Active Layer | LCP  | 27 | 33 | 30   | 35 |
| 78 | 69.463993 | -139.09123 | 101.37 | -27.55 | 18.97 | 27.45 | 0.81  | 0.26 | 4.15  | Permafrost   | LCP  | 32 | 40 | 36   | 35 |
| 79 | 69.46312  | -139.11214 | 133.22 | -27.91 | 17.07 | 23.83 | 0.11  | 0.14 | 5.83  | Permafrost   | HCP  | 25 | 35 | 30   | 31 |
| 80 | 69.464094 | -139.09713 | 40.15  | -27.82 | 15.09 | 34.29 | 0.39  | 0.15 | 5.12  | Active Layer | LCP  | 0  | 12 | 6    | 25 |
| 81 | 69.464094 | -139.09713 | 81.25  | -      | -     | 26.11 | 0.72  | 0.67 | 5.06  | Active Layer | LCP  | 18 | 35 | 26.5 | 25 |

## Supplementary Tables

|     |           |            |        |        |       |       |      |      |       |              |      |    |     |      |    |
|-----|-----------|------------|--------|--------|-------|-------|------|------|-------|--------------|------|----|-----|------|----|
| 82  | 69.464094 | -139.09713 | 139.69 | -28.14 | 15.81 | 18.93 | 0.85 | 0.20 | 10.44 | Permafrost   | LCP  | 35 | 40  | 37.5 | 25 |
| 83  | 69.464094 | -139.09713 | 74.16  | -27.88 | 13.96 | 15.47 | 0.51 | 0.16 | 6.04  | Permafrost   | LCP  | 40 | 50  | 45   | 25 |
| 84  | 69.464094 | -139.09713 | 14.57  | -      | -     | -     | -    | -    | 2.01  | Permafrost   | LCP  | 50 | 60  | 55   | 25 |
| 85  | 69.463393 | -139.10312 | 169.85 | -29.14 | 25.55 | 6.62  | 5.12 | 0.11 | 5.59  | Active Layer | HCP  | 17 | 23  | 20   | 19 |
| 86  | 69.463393 | -139.10312 | 133.65 | -      | -     | 15.56 | 1.82 | 0.15 | 7.14  | Permafrost   | HCP  | 23 | 35  | 29   | 19 |
| 87  | 69.470015 | -139.10556 | 280.65 | -26.94 | 14.66 | 31.07 | 3.29 | 1.25 | 4.63  | Active Layer | HCP  | 6  | 26  | 16   | 35 |
| 88  | 69.470015 | -139.10556 | 109.52 | -29.09 | 17.32 | 25.93 | 0.08 | 0.27 | 4.33  | Permafrost   | HCP  | 35 | 39  | 37   | 35 |
| 89  | 69.470778 | -139.1099  | 69.77  | -28.35 | 20.46 | 19.13 | 2.44 | 0.11 | 2.37  | Active Layer | HCP  | 14 | 20  | 17   | 16 |
| 90  | 69.46312  | -139.11214 | 166.32 | -27.90 | 16.72 | 16.58 | 2.36 | 0.21 | 9.45  | Permafrost   | HCP  | 35 | 45  | 40   | 31 |
| 91  | 69.470778 | -139.1099  | 96.90  | -27.84 | 17.61 | 26.07 | 0.73 | 0.17 | 5.50  | Permafrost   | HCP  | 25 | 35  | 30   | 16 |
| 92  | 69.470544 | -139.11677 | 169.54 | -29.10 | 24.65 | 6.91  | -    | -    | 4.09  | Active Layer | flat | 21 | 25  | 23   | 28 |
| 93  | 69.470544 | -139.11677 | 96.40  | -29.31 | 24.71 | 9.94  | 0.74 | 0.07 | 7.06  | Permafrost   | flat | 25 | 35  | 30   | 28 |
| 94  | 69.469604 | -139.11749 | 91.18  | -27.85 | 16.67 | 9.44  | 0.66 | 0.06 | 4.41  | Active Layer | HCP  | 20 | 26  | 23   | 32 |
| 95  | 69.469604 | -139.11749 | 164.43 | -26.82 | 18.61 | 15.27 | 1.40 | 0.21 | 2.78  | Active Layer | HCP  | 25 | 31  | 28   | 32 |
| 96  | 69.469604 | -139.11749 | 71.54  | -27.52 | 19.07 | 19.22 | 0.61 | 0.12 | 3.89  | Permafrost   | HCP  | 34 | 40  | 37   | 32 |
| 97  | 69.467569 | -139.11932 | 45.09  | -26.31 | 28.41 | 40.37 | 0.70 | 0.28 | 1.81  | Active Layer | HCP  | 0  | 12  | 6    | 19 |
| 98  | 69.467569 | -139.11932 | 50.97  | -25.80 | 16.98 | 32.13 | 0.59 | 0.19 | 5.73  | Active Layer | HCP  | 12 | 18  | 15   | 19 |
| 99  | 69.467569 | -139.11932 | 109.63 | -28.29 | 16.93 | 9.59  | 0.95 | 0.09 | 6.62  | Active Layer | HCP  | 18 | 24  | 21   | 19 |
| 100 | 69.467569 | -139.11932 | 88.25  | -27.09 | 16.17 | 19.45 | 0.70 | 0.14 | 4.76  | Active Layer | HCP  | 17 | 24  | 20.5 | 19 |
| 101 | 69.46312  | -139.11214 | 256.75 | -27.95 | 16.85 | 16.02 | 4.10 | 0.45 | 17.43 | Permafrost   | HCP  | 45 | 55  | 50   | 31 |
| 102 | 69.467569 | -139.11932 | 169.74 | -27.55 | 14.78 | 24.28 | 1.17 | 0.28 | 10.59 | Permafrost   | HCP  | 20 | 30  | 25   | 19 |
| 103 | 69.467569 | -139.11932 | 116.04 | -27.41 | 13.00 | 12.65 | 1.52 | 0.19 | 8.81  | Permafrost   | HCP  | 30 | 40  | 35   | 19 |
| 104 | 69.467569 | -139.11932 | 379.06 | -27.32 | 13.06 | 12.54 | 7.34 | 0.92 | 28.13 | Permafrost   | HCP  | 40 | 50  | 45   | 19 |
| 105 | 69.467569 | -139.11932 | 185.97 | -28.12 | 15.36 | 14.97 | 2.40 | 0.36 | 12.41 | Permafrost   | HCP  | 50 | 60  | 55   | 19 |
| 106 | 69.467569 | -139.11932 | 168.87 | -27.35 | 14.86 | 12.09 | 1.75 | 0.21 | 10.92 | Permafrost   | HCP  | 60 | 70  | 65   | 19 |
| 107 | 69.467569 | -139.11932 | 151.15 | -27.20 | 14.99 | 12.75 | 3.75 | 0.48 | 9.74  | Permafrost   | HCP  | 70 | 80  | 75   | 19 |
| 108 | 69.467569 | -139.11932 | 244.57 | -27.03 | 14.44 | 9.99  | 4.11 | 0.41 | 16.34 | Permafrost   | HCP  | 80 | 90  | 85   | 19 |
| 109 | 69.467569 | -139.11932 | 260.38 | -26.78 | 14.81 | 11.95 | 4.03 | 0.48 | 16.53 | Permafrost   | HCP  | 90 | 100 | 95   | 19 |

## Supplementary Tables

|     |           |            |        |        |       |       |      |      |       |              |      |    |     |      |    |
|-----|-----------|------------|--------|--------|-------|-------|------|------|-------|--------------|------|----|-----|------|----|
| 110 | 69.468184 | -139.12182 | 78.87  | -27.95 | 18.00 | 14.48 | 0.75 | 0.11 | 10.77 | Active Layer | HCP  | 23 | 27  | 25   | 32 |
| 111 | 69.468184 | -139.12182 | 199.47 | -27.53 | 16.36 | 18.55 | 1.46 | 0.27 | 7.86  | Permafrost   | HCP  | 27 | 40  | 33.5 | 32 |
| 112 | 69.46312  | -139.11214 | 193.68 | -27.82 | 16.03 | 14.59 | 0.28 | 0.22 | 15.22 | Permafrost   | HCP  | 55 | 70  | 62.5 | 31 |
| 113 | 69.461047 | -139.08672 | 96.58  | -27.06 | 17.32 | 8.73  | 0.38 | 0.03 | 4.24  | Active Layer | flat | 18 | 24  | 21   | 25 |
| 114 | 69.461047 | -139.08672 | 88.59  | -26.04 | 16.34 | 5.68  | 0.28 | 0.02 | 4.66  | Permafrost   | flat | 22 | 30  | 26   | 25 |
| 115 | 69.463085 | -139.08719 | 124.81 | -27.98 | 21.26 | 21.36 | 0.84 | 0.18 | 5.25  | Active Layer | HCP  | 15 | 24  | 19.5 | 60 |
| 116 | 69.463085 | -139.08719 | 181.20 | -27.79 | 19.60 | 34.43 | 1.12 | 0.39 | 8.49  | Permafrost   | HCP  | 25 | 35  | 30   | 60 |
| 117 | 69.465535 | -139.09234 | 47.70  | -28.39 | 13.48 | 32.79 | 0.60 | 0.20 | 4.59  | Active Layer | HCP  | 0  | 8   | 4    | 40 |
| 118 | 69.465535 | -139.09234 | 30.64  | -28.53 | 15.02 | 36.63 | 0.37 | 0.14 | 2.07  | Active Layer | HCP  | 8  | 18  | 13   | 40 |
| 119 | 69.465535 | -139.09234 | 83.63  | -28.88 | 17.11 | 11.81 | 0.52 | 0.06 | 5.03  | Active Layer | HCP  | 24 | 30  | 27   | 40 |
| 120 | 69.465535 | -139.09234 | 72.49  | -28.14 | 19.65 | 14.84 | 0.52 | 0.08 | 5.31  | Permafrost   | HCP  | 29 | 39  | 34   | 40 |
| 121 | 69.465535 | -139.09234 | 114.82 | -27.74 | 18.11 | 17.68 | 0.95 | 0.17 | 7.27  | Permafrost   | HCP  | 39 | 50  | 44.5 | 40 |
| 122 | 69.465535 | -139.09234 | 145.01 | -27.28 | 20.20 | 28.57 | 1.89 | 0.54 | 11.95 | Permafrost   | HCP  | 50 | 60  | 55   | 40 |
| 123 | 69.46312  | -139.11214 | 148.68 | -27.81 | 16.26 | 13.71 | 0.37 | 0.49 | 13.38 | Permafrost   | HCP  | 70 | 80  | 75   | 31 |
| 124 | 69.465535 | -139.09234 | 199.59 | -27.54 | 17.35 | 16.55 | 4.08 | 0.67 | 17.32 | Permafrost   | HCP  | 60 | 70  | 65   | 40 |
| 125 | 69.465535 | -139.09234 | 269.77 | -27.78 | 16.63 | 12.06 | 6.04 | 0.73 | 24.23 | Permafrost   | HCP  | 70 | 80  | 75   | 40 |
| 126 | 69.465535 | -139.09234 | 201.64 | -      | -     | -     | -    | -    | -     | Permafrost   | HCP  | 80 | 90  | 85   | 40 |
| 127 | 69.465535 | -139.09234 | 347.27 | -27.95 | 16.65 | 16.73 | 0.65 | 0.11 | 18.08 | Permafrost   | HCP  | 90 | 100 | 95   | 40 |
| 128 | 69.465834 | -139.08874 | 50.70  | -27.04 | 15.83 | 14.65 | 0.50 | 0.07 | 2.73  | Active Layer | HCP  | 19 | 25  | 22   | 30 |
| 129 | 69.465834 | -139.08874 | 93.27  | -26.51 | 16.02 | 11.70 | 0.70 | 0.08 | 4.89  | Permafrost   | HCP  | 30 | 40  | 35   | 30 |
| 130 | 69.465859 | -139.126   | 41.62  | -27.12 | 18.40 | 32.97 | 0.68 | 0.22 | 1.04  | Active Layer | HCP  | 0  | 6   | 3    | 26 |
| 131 | 69.465859 | -139.126   | 100.18 | -27.47 | 15.24 | 29.69 | 0.80 | 0.24 | 3.94  | Active Layer | HCP  | 6  | 15  | 10.5 | 26 |
| 132 | 69.465859 | -139.126   | 104.37 | -28.10 | 16.38 | 22.10 | 1.08 | 0.24 | 5.03  | Permafrost   | HCP  | 20 | 26  | 23   | 26 |
| 133 | 69.465859 | -139.126   | 139.95 | -28.08 | 13.88 | 26.70 | 0.63 | 0.17 | 8.87  | Permafrost   | HCP  | 26 | 40  | 33   | 26 |
| 134 | 69.46312  | -139.11214 | 31.00  | -27.57 | 14.78 | -     | -    | 0.68 | 3.30  | Permafrost   | HCP  | 80 | 90  | 85   | 31 |
| 135 | 69.465859 | -139.126   | 27.97  | -      | -     | -     | -    | -    | 2.72  | Permafrost   | HCP  | 40 | 50  | 45   | 26 |
| 136 | 69.465859 | -139.126   | 31.98  | -      | -     | -     | -    | -    | -     | Permafrost   | HCP  | 50 | 60  | 55   | 26 |
| 137 | 69.464537 | -139.12584 | 75.17  | -30.84 | 18.34 | 34.26 | 1.57 | 0.54 | 4.26  | Active Layer | LCP  | 0  | 11  | 5.5  | 41 |

## Supplementary Tables

|     |            |            |        |        |       |       |      |      |       |              |     |    |      |       |    |
|-----|------------|------------|--------|--------|-------|-------|------|------|-------|--------------|-----|----|------|-------|----|
| 138 | 69.464537  | -139.12584 | 135.43 | -28.94 | 15.38 | 32.72 | 2.13 | 0.70 | 2.41  | Active Layer | LCP | 11 | 25   | 18    | 41 |
| 139 | 69.464537  | -139.12584 | 80.19  | -      | -     | 8.41  | 1.05 | 0.09 | 2.40  | Active Layer | LCP | 25 | 38   | 31.5  | 41 |
| 140 | 69.464537  | -139.12584 | 95.30  | -28.50 | 15.51 | 21.74 | 1.49 | 0.32 | 4.62  | Active Layer | LCP | 38 | 50   | 44    | 41 |
| 141 | 69.464537  | -139.12584 | 148.43 | -27.63 | 15.84 | 8.78  | 1.74 | 0.15 | 9.18  | Permafrost   | LCP | 50 | 60   | 55    | 41 |
| 142 | 69.464537  | -139.12584 | 211.28 | -27.63 | 13.53 | 10.62 | 2.31 | 0.25 | 14.69 | Permafrost   | LCP | 60 | 70   | 65    | 41 |
| 143 | 69.464537  | -139.12584 | 228.31 | -27.92 | 15.91 | 15.71 | 3.25 | 0.51 | 16.01 | Permafrost   | LCP | 70 | 80   | 75    | 41 |
| 144 | 69.464537  | -139.12584 | 176.69 | -28.57 | 21.77 | 13.33 | 9.14 | 1.22 | 14.54 | Permafrost   | LCP | 80 | 90   | 85    | 41 |
| 145 | 69.4646868 | -139.087   | -      | -26.97 | 19.87 | 17.87 | -    | -    | -     | Permafrost   | HCP | 61 | 81.5 | 71.25 | 31 |
| 146 | 69.4653797 | -139.08474 | -      | -25.63 | 18.42 | 9.05  | -    | -    | -     | Permafrost   | LCP | 49 | 58   | 53.5  | 19 |

## Supplementary Tables

Table S5. Incubated tributary stream water DOC and POC.

| ID | Latitude    | Longitude    | Location | Instance | Aliquot | T-INC | DOC (mg/L) | $\delta^{13}\text{C}$ -DOC (‰) | POC (mg/L) | $\delta^{13}\text{C}$ -POC (‰) |
|----|-------------|--------------|----------|----------|---------|-------|------------|--------------------------------|------------|--------------------------------|
| 1  | 69.47081    | -139.0975317 | A        | 1        | 1       | 0     | 31.70      | -28.45                         | 2.04       | -35.92                         |
| 2  | 69.47081    | -139.0975317 | A        | 1        | 2       | 0     | 32.40      | -28.68                         | 2.04       | -35.92                         |
| 3  | 69.47081    | -139.0975317 | A        | 1        | 3       | 0     | 32.50      | -28.37                         | 2.04       | -35.92                         |
| 4  | 69.47081    | -139.0975317 | A        | 1        | 1       | 7     | 31.60      | -28.77                         | -          | -                              |
| 5  | 69.47081    | -139.0975317 | A        | 1        | 2       | 7     | 29.80      | -28.93                         | -          | -                              |
| 6  | 69.47081    | -139.0975317 | A        | 1        | 3       | 7     | 29.30      | -29.05                         | -          | -                              |
| 7  | 69.47081    | -139.0975317 | A        | 2        | 1       | 0     | 36.10      | -28.17                         | 1.76       | -34.65                         |
| 8  | 69.47081    | -139.0975317 | A        | 2        | 2       | 0     | 36.60      | -28.27                         | 1.76       | -34.65                         |
| 9  | 69.47081    | -139.0975317 | A        | 2        | 3       | 0     | 36.40      | -28.35                         | 1.76       | -34.65                         |
| 10 | 69.47081    | -139.0975317 | A        | 2        | 1       | 7     | 36.20      | -28.47                         | -          | -                              |
| 11 | 69.47081    | -139.0975317 | A        | 2        | 2       | 7     | 35.40      | -28.32                         | -          | -                              |
| 12 | 69.47081    | -139.0975317 | A        | 2        | 3       | 7     | 37.40      | -28.42                         | -          | -                              |
| 13 | 69.46656167 | -139.0730583 | A        | 3        | 1       | 0     | 36.60      | -27.91                         | 0.69       | -33.40                         |
| 14 | 69.46656167 | -139.0730583 | A        | 3        | 2       | 0     | 36.90      | -28.29                         | 0.69       | -33.40                         |
| 15 | 69.46656167 | -139.0730583 | A        | 3        | 3       | 0     | 36.00      | -28.31                         | 0.69       | -33.40                         |
| 16 | 69.46656167 | -139.0730583 | A        | 3        | 1       | 7     | 37.30      | -28.35                         | -          | -                              |
| 17 | 69.46656167 | -139.0730583 | A        | 3        | 2       | 7     | 36.20      | -28.41                         | -          | -                              |
| 18 | 69.46656167 | -139.0730583 | A        | 3        | 3       | 7     | 36.30      | -28.23                         | -          | -                              |
| 19 | 69.46469333 | -139.12684   | B        | 1        | 1       | 0     | 16.50      | -28.51                         | 1.80       | -31.83                         |
| 20 | 69.46469333 | -139.12684   | B        | 1        | 2       | 0     | 16.30      | -28.50                         | 1.80       | -31.83                         |
| 21 | 69.46469333 | -139.12684   | B        | 1        | 3       | 0     | 16.30      | -28.57                         | 1.80       | -31.83                         |
| 22 | 69.46469333 | -139.12684   | B        | 1        | 1       | 7     | 13.40      | -28.92                         | -          | -                              |
| 23 | 69.46469333 | -139.12684   | B        | 1        | 2       | 7     | 13.80      | -28.70                         | -          | -                              |
| 24 | 69.46469333 | -139.12684   | B        | 1        | 3       | 7     | 13.50      | -29.38                         | -          | -                              |
| 25 | 69.46469333 | -139.12684   | B        | 2        | 1       | 0     | 16.20      | -28.69                         | 1.12       | -30.41                         |

## Supplementary Tables

|    |             |              |   |   |   |   |       |        |      |        |
|----|-------------|--------------|---|---|---|---|-------|--------|------|--------|
| 26 | 69.46469333 | -139.12684   | B | 2 | 2 | 0 | 15.90 | -28.64 | 1.12 | -30.41 |
| 27 | 69.46469333 | -139.12684   | B | 2 | 3 | 0 | 16.30 | -28.73 | 1.12 | -30.41 |
| 28 | 69.46469333 | -139.12684   | B | 2 | 1 | 7 | 15.90 | -28.36 | -    | -      |
| 29 | 69.46469333 | -139.12684   | B | 2 | 2 | 7 | 16.10 | -28.48 | -    | -      |
| 30 | 69.46469333 | -139.12684   | B | 2 | 3 | 7 | 16.60 | -28.44 | -    | -      |
| 31 | 69.46655667 | -139.07303   | B | 3 | 1 | 0 | 16.60 | -28.30 | 1.54 | -31.66 |
| 32 | 69.46655667 | -139.07303   | B | 3 | 2 | 0 | 16.60 | -28.48 | 1.54 | -31.66 |
| 33 | 69.46655667 | -139.07303   | B | 3 | 3 | 0 | 16.70 | -28.30 | 1.54 | -31.66 |
| 34 | 69.46655667 | -139.07303   | B | 3 | 1 | 7 | 16.90 | -28.36 | -    | -      |
| 35 | 69.46655667 | -139.07303   | B | 3 | 2 | 7 | 16.60 | -28.48 | -    | -      |
| 36 | 69.46655667 | -139.07303   | B | 3 | 3 | 7 | 16.20 | -28.64 | -    | -      |
| 37 | 69.46764167 | -139.09871   | C | 1 | 1 | 0 | 18.00 | -28.24 | 0.66 | -35.05 |
| 38 | 69.46764167 | -139.09871   | C | 1 | 2 | 0 | 18.00 | -28.59 | 0.66 | -35.05 |
| 39 | 69.46764167 | -139.09871   | C | 1 | 3 | 0 | 18.30 | -28.34 | 0.66 | -35.05 |
| 40 | 69.46764167 | -139.09871   | C | 1 | 1 | 7 | 17.90 | -28.29 | -    | -      |
| 41 | 69.46764167 | -139.09871   | C | 1 | 2 | 7 | 17.70 | -28.30 | -    | -      |
| 42 | 69.46764167 | -139.09871   | C | 1 | 3 | 7 | 17.90 | -28.30 | -    | -      |
| 43 | 69.46765333 | -139.0986583 | C | 2 | 1 | 0 | 17.80 | -28.44 | 0.52 | -30.44 |
| 44 | 69.46765333 | -139.0986583 | C | 2 | 2 | 0 | 17.00 | -28.69 | 0.52 | -30.44 |
| 45 | 69.46765333 | -139.0986583 | C | 2 | 3 | 0 | 16.10 | -29.03 | 0.52 | -30.44 |
| 46 | 69.46765333 | -139.0986583 | C | 2 | 1 | 7 | 17.90 | -28.55 | -    | -      |
| 47 | 69.46765333 | -139.0986583 | C | 2 | 2 | 7 | 17.70 | -28.38 | -    | -      |
| 48 | 69.46765333 | -139.0986583 | C | 2 | 3 | 7 | 17.50 | -28.30 | -    | -      |
| 49 | 69.46655167 | -139.0730467 | C | 3 | 1 | 0 | 17.50 | -28.93 | 0.34 | -30.78 |
| 50 | 69.46655167 | -139.0730467 | C | 3 | 2 | 0 | 17.30 | -28.59 | 0.34 | -30.78 |
| 51 | 69.46655167 | -139.0730467 | C | 3 | 3 | 0 | 17.20 | -28.49 | 0.34 | -30.78 |
| 52 | 69.46655167 | -139.0730467 | C | 3 | 1 | 7 | 17.70 | -28.50 | -    | -      |
| 53 | 69.46655167 | -139.0730467 | C | 3 | 2 | 7 | 17.50 | -28.48 | -    | -      |

## Supplementary Tables

|    |             |              |   |   |   |   |       |        |   |   |
|----|-------------|--------------|---|---|---|---|-------|--------|---|---|
| 54 | 69.46655167 | -139.0730467 | C | 3 | 3 | 7 | 18.00 | -28.30 | - | - |
|----|-------------|--------------|---|---|---|---|-------|--------|---|---|

## Supplementary Tables

Table S6. Spectral indices for which differences between various landscape classes were significant ( $p < 0.05$ ).

|         | HCP          |                                        | LCP                                    |            | Flat                   |            | Streams                            |              |
|---------|--------------|----------------------------------------|----------------------------------------|------------|------------------------|------------|------------------------------------|--------------|
|         | Active layer | Permafrost                             | Active layer                           | Permafrost | Active layer           | Permafrost | Tributaries                        | Main channel |
| HCP     | Active layer | -                                      |                                        |            |                        |            |                                    |              |
|         | Permafrost   | FI, FRESH, BIX, a254/a365, Sr, SUVA254 | -                                      |            |                        |            |                                    |              |
| LCP     | Active layer | FI, FRESH, BIX, SUVA254                | FI, FRESH, BIX, a254/a365, Sr, SUVA254 | -          |                        |            |                                    |              |
|         | Permafrost   | FI, FRESH, BIX, a254/a365, Sr, SUVA254 | FI, a254/a365, Sr                      | -          |                        |            |                                    |              |
| Flat    | Active layer | FI                                     | FI, FRESH, BIX, a254/a365, Sr, SUVA254 | -          | FI, a254/a365, SUVA254 | -          |                                    |              |
|         | Permafrost   | FI, FRESH, BIX, Sr, SUVA254            | FI, a254/a365                          | -          | FI                     | SUVA254    | -                                  |              |
| Streams | Tributaries  | -                                      | -                                      | -          | -                      | -          | -                                  | -            |
|         | Main channel | -                                      | -                                      | -          | -                      | -          | FI, FRESH, HIX, BIX, a254/a365, Sr | -            |



## Supplementary Tables

Table S7. Sensitivity analysis of EMMA for permafrost tracer means.

| Model                                             | Source             | $\delta^{13}\text{C-DOC}$<br>(‰ VPDB) | $a_{254}/a_{365}$ | Sr          | Source contribution |        |        |       |      | Percentage change |        |        |      |      |
|---------------------------------------------------|--------------------|---------------------------------------|-------------------|-------------|---------------------|--------|--------|-------|------|-------------------|--------|--------|------|------|
|                                                   |                    |                                       |                   |             | 2.5th               | median | 97.5th | mean  | std  | 2.5th             | median | 97.5th | mean | std  |
| Original                                          | Permafrost         | -24.15 ±1.03‰                         | 5.81 ±1.23        | 0.85 ±0.080 | 0.088               | 0.4908 | 0.843  | 0.487 | 0.19 | 0%                | 0%     | 0%     | 0%   | 0%   |
|                                                   | Active layer       | -26.40 ±1.07‰                         | 4.55 ±0.84        | 0.71 ±0.084 | 0.013               | 0.276  | 0.784  | 0.308 | 0.21 | 0%                | 0%     | 0%     | 0%   | 0%   |
|                                                   | Primary production | -28.48 ±1.00‰                         | 5.40 ±0.23        | 0.78 ±0.020 | 0.009               | 0.1823 | 0.535  | 0.206 | 0.14 | 0%                | 0%     | 0%     | 0%   | 0%   |
| $\delta^{13}\text{C-DOC}_{\text{pf}}$<br>+5% mean | Permafrost         | -25.36 ±1.03‰                         | 5.81 ±1.23        | 0.85 ±0.080 | 0.074               | 0.5357 | 0.887  | 0.516 | 0.22 | -15%              | 9%     | 5%     | 6%   | 16%  |
|                                                   | Active layer       | -26.40 ±1.07‰                         | 4.55 ±0.84        | 0.71 ±0.084 | 0.014               | 0.2801 | 0.793  | 0.316 | 0.22 | 12%               | 1%     | 1%     | 3%   | 5%   |
|                                                   | Primary production | -28.48 ±1.00‰                         | 5.40 ±0.23        | 0.78 ±0.020 | 0.008               | 0.1387 | 0.513  | 0.169 | 0.14 | -10%              | -24%   | -4%    | -18% | -5%  |
| $\delta^{13}\text{C-DOC}_{\text{pf}}$<br>-5% mean | Permafrost         | -22.94 ±1.03‰                         | 5.81 ±1.23        | 0.85 ±0.080 | 0.068               | 0.4078 | 0.702  | 0.403 | 0.16 | -23%              | -17%   | -17%   | -17% | -17% |
|                                                   | Active layer       | -26.40 ±1.07‰                         | 4.55 ±0.84        | 0.71 ±0.084 | 0.013               | 0.3006 | 0.797  | 0.329 | 0.22 | 4%                | 9%     | 2%     | 7%   | 3%   |
|                                                   | Primary production | -28.48 ±1.00‰                         | 5.40 ±0.23        | 0.78 ±0.020 | 0.015               | 0.2554 | 0.608  | 0.269 | 0.16 | 73%               | 40%    | 14%    | 31%  | 13%  |
| $a_{254}/a_{365}_{\text{pf}}$<br>+5% mean         | Permafrost         | -24.15 ±1.03‰                         | 6.10 ±1.23        | 0.85 ±0.080 | 0.086               | 0.4772 | 0.825  | 0.471 | 0.19 | -1%               | -3%    | -2%    | -3%  | 0%   |
|                                                   | Active layer       | -26.40 ±1.07‰                         | 4.55 ±0.84        | 0.71 ±0.084 | 0.014               | 0.2913 | 0.8    | 0.321 | 0.22 | 11%               | 6%     | 2%     | 4%   | 3%   |
|                                                   | Primary production | -28.48 ±1.00‰                         | 5.40 ±0.23        | 0.78 ±0.020 | 0.007               | 0.1846 | 0.563  | 0.208 | 0.15 | -19%              | 1%     | 5%     | 1%   | 6%   |
| $a_{254}/a_{365}_{\text{pf}}$<br>-5% mean         | Permafrost         | -24.15 ±1.03‰                         | 5.52 ±1.23        | 0.85 ±0.080 | 0.06                | 0.4935 | 0.833  | 0.481 | 0.19 | -31%              | 1%     | -1%    | -1%  | 3%   |
|                                                   | Active layer       | -26.40 ±1.07‰                         | 4.55 ±0.84        | 0.71 ±0.084 | 0.016               | 0.2749 | 0.799  | 0.312 | 0.22 | 22%               | 0%     | 2%     | 1%   | 4%   |
|                                                   | Primary production | -28.48 ±1.00‰                         | 5.40 ±0.23        | 0.78 ±0.020 | 0.011               | 0.1839 | 0.543  | 0.207 | 0.15 | 28%               | 1%     | 2%     | 1%   | 2%   |
| $\text{Sr}_{\text{pf}}$<br>+5% mean               | Permafrost         | -24.15 ±1.03‰                         | 5.81 ±1.23        | 0.89 ±0.080 | 0.087               | 0.4897 | 0.839  | 0.482 | 0.19 | -1%               | 0%     | 0%     | -1%  | 1%   |
|                                                   | Active layer       | -26.40 ±1.07‰                         | 4.55 ±0.84        | 0.71 ±0.084 | 0.016               | 0.269  | 0.782  | 0.304 | 0.21 | 26%               | -3%    | 0%     | -1%  | 0%   |
|                                                   | Primary production | -28.48 ±1.00‰                         | 5.40 ±0.23        | 0.78 ±0.020 | 0.011               | 0.1916 | 0.551  | 0.214 | 0.15 | 22%               | 5%     | 3%     | 4%   | 2%   |
| $\text{Sr}_{\text{pf}}$<br>-5% mean               | Permafrost         | -24.15 ±1.03‰                         | 5.81 ±1.23        | 0.81 ±0.080 | 0.063               | 0.4864 | 0.827  | 0.475 | 0.19 | -29%              | -1%    | -2%    | -2%  | 3%   |
|                                                   | Active layer       | -26.40 ±1.07‰                         | 4.55 ±0.84        | 0.71 ±0.084 | 0.013               | 0.2753 | 0.812  | 0.312 | 0.22 | -2%               | 0%     | 4%     | 1%   | 4%   |
|                                                   | Primary production | -28.48 ±1.00‰                         | 5.40 ±0.23        | 0.78 ±0.020 | 0.011               | 0.1904 | 0.555  | 0.214 | 0.15 | 26%               | 4%     | 4%     | 4%   | 3%   |

## Supplementary Tables

Table S8. Sensitivity analysis of EMMA for permafrost tracer standard deviations.

| Model                                            | Source             | $\delta^{13}\text{C-DOC}$<br>(‰ VPDB) | $a_{254}/a_{365}$ | Sr          | Source contribution |        |        |       |       | Percentage change |        |        |      |     |
|--------------------------------------------------|--------------------|---------------------------------------|-------------------|-------------|---------------------|--------|--------|-------|-------|-------------------|--------|--------|------|-----|
|                                                  |                    |                                       |                   |             | 2.5th.              | median | 97.5th | mean  | std   | 2.5th.            | median | 97.5th | mean | std |
| Original                                         | Permafrost         | -24.15 ±1.03‰                         | 5.81 ±1.23        | 0.85 ±0.080 | 0.088               | 0.491  | 0.843  | 0.487 | 0.186 | 0%                | 0%     | 0%     | 0%   | 0%  |
|                                                  | Active layer       | -26.40 ±1.07‰                         | 4.55 ±0.84        | 0.71 ±0.084 | 0.013               | 0.276  | 0.784  | 0.308 | 0.209 | 0%                | 0%     | 0%     | 0%   | 0%  |
|                                                  | Primary production | -28.48 ±1.00‰                         | 5.40 ±0.23        | 0.78 ±0.020 | 0.009               | 0.182  | 0.535  | 0.206 | 0.143 | 0%                | 0%     | 0%     | 0%   | 0%  |
| $\delta^{13}\text{C-DOC}_{\text{pf}}$<br>+5% std | Permafrost         | -24.15 ±1.08‰                         | 5.81 ±1.23        | 0.85 ±0.080 | 0.093               | 0.474  | 0.822  | 0.471 | 0.182 | 6%                | -3%    | -2%    | -3%  | -2% |
|                                                  | Active layer       | -26.40 ±1.07‰                         | 4.55 ±0.84        | 0.71 ±0.084 | 0.017               | 0.290  | 0.775  | 0.318 | 0.206 | 36%               | 5%     | -1%    | 3%   | -1% |
|                                                  | Primary production | -28.48 ±1.00‰                         | 5.40 ±0.23        | 0.78 ±0.020 | 0.008               | 0.190  | 0.550  | 0.211 | 0.148 | -7%               | 4%     | 3%     | 3%   | 3%  |
| $\delta^{13}\text{C-DOC}_{\text{pf}}$<br>-5% std | Permafrost         | -24.15 ±0.98‰                         | 5.81 ±1.29        | 0.85 ±0.080 | 0.075               | 0.490  | 0.823  | 0.479 | 0.187 | -14%              | 0%     | -2%    | -2%  | 0%  |
|                                                  | Active layer       | -26.40 ±1.07‰                         | 4.55 ±0.84        | 0.71 ±0.084 | 0.015               | 0.276  | 0.795  | 0.310 | 0.214 | 15%               | 0%     | 1%     | 1%   | 2%  |
|                                                  | Primary production | -28.48 ±1.00‰                         | 5.40 ±0.23        | 0.78 ±0.020 | 0.010               | 0.189  | 0.541  | 0.211 | 0.145 | 12%               | 3%     | 1%     | 2%   | 1%  |
| $a_{254}/a_{365\text{pf}}$<br>+5% std            | Permafrost         | -24.15 ±1.03‰                         | 5.81 ±1.23        | 0.85 ±0.080 | 0.075               | 0.480  | 0.830  | 0.473 | 0.189 | -14%              | -2%    | -1%    | -3%  | 2%  |
|                                                  | Active layer       | -26.40 ±1.07‰                         | 4.55 ±0.84        | 0.71 ±0.084 | 0.012               | 0.291  | 0.800  | 0.320 | 0.214 | -4%               | 6%     | 2%     | 4%   | 2%  |
|                                                  | Primary production | -28.48 ±1.00‰                         | 5.40 ±0.23        | 0.78 ±0.020 | 0.011               | 0.183  | 0.547  | 0.207 | 0.146 | 21%               | 0%     | 2%     | 1%   | 2%  |
| $a_{254}/a_{365\text{pf}}$<br>-5% std            | Permafrost         | -24.15 ±1.03‰                         | 5.81 ±1.17        | 0.85 ±0.080 | 0.114               | 0.494  | 0.832  | 0.490 | 0.180 | 31%               | 1%     | -1%    | 1%   | -3% |
|                                                  | Active layer       | -26.40 ±1.07‰                         | 4.55 ±0.84        | 0.71 ±0.084 | 0.018               | 0.268  | 0.757  | 0.300 | 0.203 | 42%               | -3%    | -3%    | -3%  | -3% |
|                                                  | Primary production | -28.48 ±1.00‰                         | 5.40 ±0.23        | 0.78 ±0.020 | 0.013               | 0.189  | 0.533  | 0.210 | 0.141 | 43%               | 4%     | 0%     | 2%   | -2% |
| $\text{Sr}_{\text{pf}}$<br>+5% std               | Permafrost         | -24.15 ±1.03‰                         | 5.81 ±1.23        | 0.85 ±0.084 | 0.086               | 0.485  | 0.824  | 0.477 | 0.184 | -2%               | -1%    | -2%    | -2%  | -1% |
|                                                  | Active layer       | -26.40 ±1.07‰                         | 4.55 ±0.84        | 0.71 ±0.084 | 0.016               | 0.275  | 0.783  | 0.307 | 0.210 | 22%               | 0%     | 0%     | 0%   | 0%  |
|                                                  | Primary production | -28.48 ±1.00‰                         | 5.40 ±0.23        | 0.78 ±0.020 | 0.010               | 0.195  | 0.556  | 0.216 | 0.148 | 14%               | 7%     | 4%     | 5%   | 3%  |
| $\text{Sr}_{\text{pf}}$<br>-5% std               | Permafrost         | -24.15 ±1.03‰                         | 5.81 ±1.23        | 0.85 ±0.076 | 0.082               | 0.482  | 0.830  | 0.474 | 0.188 | -7%               | -2%    | -2%    | -3%  | 1%  |
|                                                  | Active layer       | -26.40 ±1.07‰                         | 4.55 ±0.84        | 0.71 ±0.084 | 0.020               | 0.284  | 0.797  | 0.318 | 0.209 | 58%               | 3%     | 2%     | 3%   | 0%  |
|                                                  | Primary production | -28.48 ±1.00‰                         | 5.40 ±0.23        | 0.78 ±0.020 | 0.010               | 0.186  | 0.536  | 0.208 | 0.143 | 13%               | 2%     | 0%     | 1%   | -1% |

## Supplementary Tables

Table S9. Timeseries of tracer values at the catchment outlet and computed source fractions.

| Datetime      | $\delta^{13}\text{C-DOC}$ (‰ VPDB) | a254/a365 | Sr   | Permafrost | Active layer | Primary prod. |
|---------------|------------------------------------|-----------|------|------------|--------------|---------------|
| 8/9/18 00:00  | -24.84                             | 6.41      | 0.80 | 0.65       | 0.20         | 0.14          |
| 8/9/18 12:00  | -25.11                             | 4.97      | 0.81 | 0.47       | 0.37         | 0.16          |
| 8/10/18 00:00 | -25.15                             | 5.52      | 0.79 | 0.52       | 0.30         | 0.18          |
| 8/10/18 12:00 | -25.28                             | 5.22      | 0.81 | 0.46       | 0.34         | 0.20          |
| 8/13/18 14:22 | -25.67                             | 5.55      | 0.83 | 0.43       | 0.33         | 0.24          |
| 8/13/18 20:22 | -25.40                             | 5.57      | 0.83 | 0.49       | 0.30         | 0.21          |
| 8/14/18 02:22 | -25.84                             | 5.66      | 0.82 | 0.42       | 0.31         | 0.27          |
| 8/14/18 08:22 | -25.46                             | 5.49      | 0.84 | 0.46       | 0.32         | 0.22          |
| 8/14/18 14:22 | -25.64                             | 5.48      | 0.81 | 0.44       | 0.32         | 0.24          |
| 8/14/18 20:22 | -24.86                             | 5.31      | 0.82 | 0.54       | 0.32         | 0.15          |
| 8/15/18 02:22 | -26.02                             | 5.56      | 0.82 | 0.37       | 0.32         | 0.30          |
| 8/15/18 08:22 | -24.73                             | 5.54      | 0.83 | 0.59       | 0.27         | 0.14          |
| 8/15/18 14:22 | -25.87                             | 5.56      | 0.83 | 0.40       | 0.31         | 0.29          |
| 8/15/18 20:22 | -25.48                             | 5.41      | 0.83 | 0.46       | 0.31         | 0.23          |
| 8/16/18 02:22 | -25.17                             | 5.30      | 0.82 | 0.49       | 0.34         | 0.17          |
| 8/16/18 08:22 | -25.48                             | 5.56      | 0.86 | 0.47       | 0.31         | 0.22          |
| 8/16/18 14:22 | -25.13                             | 5.57      | 0.83 | 0.52       | 0.31         | 0.18          |
| 8/16/18 20:22 | -25.35                             | 5.56      | 0.83 | 0.49       | 0.31         | 0.20          |
| 8/17/18 02:22 | -25.27                             | 5.58      | 0.82 | 0.50       | 0.32         | 0.19          |
| 8/17/18 08:22 | -25.98                             | 5.61      | 0.89 | 0.38       | 0.32         | 0.29          |
| 8/17/18 14:22 | -25.42                             | 5.78      | 0.83 | 0.50       | 0.28         | 0.21          |
| 8/17/18 20:22 | -25.39                             | 6.14      | 0.84 | 0.55       | 0.25         | 0.20          |
| 8/18/18 02:22 | -24.98                             | 5.77      | 0.85 | 0.56       | 0.28         | 0.16          |
| 8/18/18 08:22 | -25.42                             | 6.11      | 0.84 | 0.55       | 0.25         | 0.20          |
| 8/18/18 14:22 | -24.76                             | 5.61      | 0.83 | 0.58       | 0.27         | 0.15          |
| 8/19/18 02:22 | -26.08                             | 5.18      | 0.83 | 0.32       | 0.38         | 0.30          |
| 8/19/18 08:22 | -25.94                             | 5.76      | 0.84 | 0.41       | 0.30         | 0.29          |
| <b>Mean</b>   | -25.40                             | 5.58      | 0.83 | 0.48       | 0.31         | 0.21          |
| <b>Max.</b>   | -24.73                             | 6.41      | 0.89 | 0.65       | 0.38         | 0.30          |
| <b>Min.</b>   | -26.08                             | 4.97      | 0.79 | 0.32       | 0.20         | 0.14          |

## Supplementary Tables
